# Supplementary material for: THY-1 Receptor Expression Differentiates Cardiosphere-Derived Cells with Divergent Cardiogenic Differentiation Potential
Source: PubMed Central journal article supplement — Stem Cell Reports. 2014 Apr 18;2(5):576–91. doi: 10.1016/j.stemcr.2014.03.003 (PMC4050474; doi:10.1016/j.stemcr.2014.03.003), 2014-04-18
Supplement: mmc6.pdf [file mmc6.pdf]

# THY-1 Receptor Expression Differentiates Cardiosphere-Derived Cells with Divergent Cardiogenic Differentiation Potential

Nuria Gago-Lopez,<sup>1,2</sup> Obinna Awaji,<sup>2</sup> Yiqiang Zhang,<sup>1</sup> Christopher Ko,<sup>2</sup> Ali Nsair,<sup>2</sup> David Liem,<sup>2</sup> April Stempien-Otero,<sup>1</sup> and W. Robb MacLellan<sup>1,2,\*</sup>

<sup>1</sup>Center for Cardiovascular Biology, Institute for Stem Cell Research and Division of Cardiology, Department of Medicine, University of Washington, Seattle, WA 98195-6422, USA

<sup>2</sup>Department of Medicine and Physiology, Cardiovascular Research Laboratory, David Geffen School of Medicine, University of California, Los Angeles, Los Angeles, CA 90095-1751, USA

\*Correspondence: [wrmaclellan@cardiology.washington.edu](mailto:wrmaclellan@cardiology.washington.edu)

<http://dx.doi.org/10.1016/j.stemcr.2014.03.003>

This is an open access article under the CC BY-NC-ND license (<http://creativecommons.org/licenses/by-nc-nd/3.0/>).

## SUMMARY

Despite over a decade of intense research, the identity and differentiation potential of human adult cardiac progenitor cells (aCPC) remains controversial. Cardiospheres have been proposed as a means to expand aCPCs in vitro, but the identity of the progenitor cell within these 3D structures is unknown. We show that clones derived from cardiospheres could be subdivided based on expression of thymocyte differentiation antigen 1 (THY-1/CD90) into two distinct populations that exhibit divergent cardiac differentiation potential. One population, which is CD90<sup>+</sup>, expressed markers consistent with a mesenchymal/myofibroblast cell. The second clone type was CD90<sup>-</sup> and could form mature, functional myocytes with sarcomeres albeit at a very low rate. These two populations of cardiogenic clones displayed distinct cell surface markers and unique transcriptomes. Our study suggests that a rare aCPC exists in cardiospheres along with a mesenchymal/myofibroblast cell, which demonstrates incomplete cardiac myocyte differentiation.

## INTRODUCTION

Adult cardiac progenitor cells (aCPCs) are a rare subpopulation of cells first reported in the adult rat heart that are self-renewing, clonogenic, and multipotent with the capacity to give rise to cardiac myocytes (CMs), smooth muscle cells (SMCs), and endothelial cells (ECs) in vitro and in vivo (Beltrami et al., 2003). Their biology, particularly human aCPCs, remains poorly understood because techniques to study human aCPCs in vivo are very limited, and in vitro studies are challenging due to the rarity of this cell type and lack of reliable methods to propagate and expand these cells in their undifferentiated state. Cardiosphere (CS) formation, a 3D culture system, has been proposed as one method to expand aCPCs in vitro (Messina et al., 2004; Davis et al., 2009). Sphere systems have been used to culture many stem cell types, including neural and skin stem cells (Reynolds and Weiss, 1992; Fernandes et al., 2004; Gago et al., 2009). Rat CS-derived clones are multipotent (Davis et al., 2009), but whether these cells exist in human CS or their identity is unknown. CSs are a heterogeneous mix of nonmyocyte cells derived from the mononuclear fraction of dissociated heart tissue, which includes mesenchymal stem cells, SMCs, ECs, and cardiac fibroblasts. Although CSs have been reported to contain an aCPC, this has been questioned, and its identity or cell surface markers that can be used to isolate these cells are unknown (Masuda et al., 2012; Smith et al., 2007). Interestingly, there is no panel of cell surface markers that can directly identify endogenous CPCs. Numerous putative

aCPCs have been reported in adult mouse heart, which were identified based on the expression of C-KIT, SCA1, or the ability to exclude Hoechst dye (Beltrami et al., 2003; Oh et al., 2004; Tomita et al., 2005). Much less data exist in human hearts, although a rare cardiac progenitor cell population of C-KIT and NKX2.5<sup>+</sup> cells has been described (Mishra et al., 2011; Goumans et al., 2007; Bearzi et al., 2007; Smits et al., 2009). However, C-KIT by itself is not specific and cannot be used by itself to identify aCPCs (Bearzi et al., 2009; Sandstedt et al., 2010). A significant proportion of the C-KIT cells in human hearts coexpresses CD45, suggesting that they may be hematopoietic in origin (Kubo et al., 2008). The early cardiac transcription factor, NK2 homeobox 5 (NKX2.5), is often used in conjunction with c-KIT to identify aCPCs (Wu et al., 2006, 2008; Mishra et al., 2011), but because it is an intracellular marker, its use is restricted to fixed cells and cannot be used for purifying human live cells. At least a subset of cardiac C-KIT cells expressed NKX2.5, but whether this C-KIT<sup>+</sup>/NKX2.5<sup>+</sup> subpopulation in adult human heart is an authentic aCPC and whether this C-KIT<sup>+</sup>/NKX2.5<sup>+</sup> cell also represents the aCPCs within CS is unknown. No systematic analysis of cell surface markers of cloned human aCPCs has been performed, and no panel of cell surface markers allowing direct isolation of aCPCs is available.

Another major limitation of the adult cardiac stem cell field is the inability to get full differentiation from putative stem/progenitor cells in vitro or in vivo. In fact, although expression of cardiac genes and proteins is demonstrated frequently, the levels, relative to authentic CMs, and their

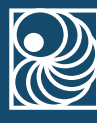

ability to form sarcomeres and display calcium transients are rarely quantified (Barile et al., 2007; Bearzi et al., 2007; He et al., 2011). In vivo engraftment studies have often demonstrated low-level retention of cells that, whereas expressing sarcomeric proteins, do not morphologically appear to resemble adult CMs (Li et al., 2010). This is also true of the CMs differentiated from human CS (Davis et al., 2009). The basis for this paradox is unknown but is a critical issue to resolve if these cells are to be used therapeutically. Despite these limitations, the therapeutic efficacy of autologous CS-derived cells after myocardial infarction was tested in a recent clinical trial by Makkar et al. (2012). The authors reported that the therapy appeared safe, reduced myocardial scar, and increased viable myocardium, but there was no global improvement in patients' cardiac function.

In the present study, we sought to determine the identity of the cell(s) with cardiogenic potential in CS generated from human hearts. We describe two distinct populations of CS-derived cells based on their expression of CD90 and their cardiomyogenic potential. The first cell population is enriched for the cardiac transcription factor *NKX2.5* and *ISL1* but negative for mesenchymal stem cell/fibroblast surface marker CD90 and negative for cardiac stem cell marker C-KIT. These CD90<sup>-</sup> cells can differentiate into SMCs, ECs, and CMs, which form complete sarcomeres and beat spontaneously but at a very low frequency. The second cell population appears to be a cardiac mesenchymal/fibroblast cell that is positive for CD90 and *Periostin* but is *NKX2.5*<sup>low</sup> and *ISL1*<sup>low</sup>. This cell demonstrated endothelial and SMC differentiation but only incomplete cardiac differentiation into CM-like cells without sarcomere formation or calcium cycling. These results may account for previous reports of multiple stem cells in the heart (Barile et al., 2007; Beltrami et al., 2003; Davis et al., 2010; Deb et al., 2003; Laflamme et al., 2002; Murry et al., 2004; Toma et al., 2002) and suggest that a cell with a phenotype consistent with a mesenchymal stem cell or myofibroblast exists in the adult heart that is capable of differentiating into CM-like cells that are not authentic mature CMs.

## RESULTS

### Differentiation of Adult Human CS-Derived Cells Primarily Gives Rise to Immature CM-like Cells

Heart-derived cells (HDCs) obtained from first plating of acutely dissociated mononuclear human cells were plated in adherent culture (ADH) or used to create CSs (Figure 1A). Undifferentiated HDCs, ADHs, and CSs were negative for the CM marker Troponin I (cTNI). ADHs but not CSs contained significant numbers of cells for SMC marker cal-

ponin (CNN; 17.8% ± 3%), or EC marker von Willebrand factor (vWF; 45% ± 15%) (Figures 1B and 1C; Figure S1A available online). After 15 days of differentiation, ADH and CS cells demonstrated similar percentages of CNN<sup>+</sup> cells (51% ± 5% versus 42% ± 8%, respectively; *p* < 0.05), but ADH demonstrated higher rates of EC differentiation in comparison with CS (vWF; 49% ± 2% versus 12% ± 7%, respectively; *p* < 0.05). Compared to ADH cells, differentiated CS-derived cells demonstrated higher percentages of cTNI<sup>+</sup> cells (6.5% ± 3% versus 27% ± 5%, respectively; *p* < 0.05). However, these CM-like cells, whereas expressing low levels of cardiac proteins, did not morphologically resemble mature myocytes (Figures 1D, 1E, and S1B).

To determine if this incomplete differentiation was related to our culture conditions or the cells themselves, we generated CSs from both fetal and adult human hearts (Figures 2Aa and 2Ai). Differentiated fetal CS-derived cells exhibited typical CM morphology with organized sarcomeres that coexpressed the cardiac-specific markers cTNT and cTNI (Figures 2Ae–2Ah). Although cells from adult CS actually exhibited higher rates of cells expressing cTNT and cTNI (27% ± 5% versus 13.3% ± 7%, respectively; *p* < 0.05), the absolute expression levels were low, and sarcomere formation was rare (Figures 2Am–2Ap; Figure 2B, right). In contrast, the majority of CMs from fetal CSs demonstrated spontaneous contractions and calcium transients (Movies S1 and S2). No differences were observed in the morphology of fetal or adult CS-derived ECs, but adult CS-derived cells exhibited lower rates of cells expressing vWF (12% ± 6% versus 28% ± 4%, respectively; *p* < 0.05). Both fetal and adult CS-derived ECs formed typical microtubular capillary networks in Matrigel (Figures 2Ab, 2Ac, 2Aj, and 2Ak; Figure 1B, left). Likewise, SMC differentiation was similar for fetal and adult CS-derived cells (CNN; 64% ± 2% versus 43% ± 16%, respectively; *p* < 0.05) (Figures 2Ad and 2Al; Figure 2B, middle).

### Human CS Contains a Heterogeneous Population of Cells

To determine if the difference in differentiation potential between CS-derived cells from fetal and adult hearts was due to divergent cell populations, we characterized CS cells by flow cytometry for the expression of a panel of surface markers that have been linked to progenitor/stem cells, including C-KIT, VEGF receptors (FLK1, FLT1, and FLT4), CD31, CD144, CD34, CD90, CD114, CD184, and CD271 (Baum et al., 1992; Coultas et al., 2005; Nelson et al., 2008; Shakhova and Sommer, 2010; Shimoji et al., 2010). We compared the expression of these surface markers on acutely dissociated mononuclear cells (ADs), HDCs, and CSs from adult and fetal human hearts (Figure S2A). The most significant differences were observed in the percentage of cells expressing C-KIT, FLT4, CD34, CD90, and

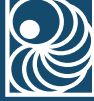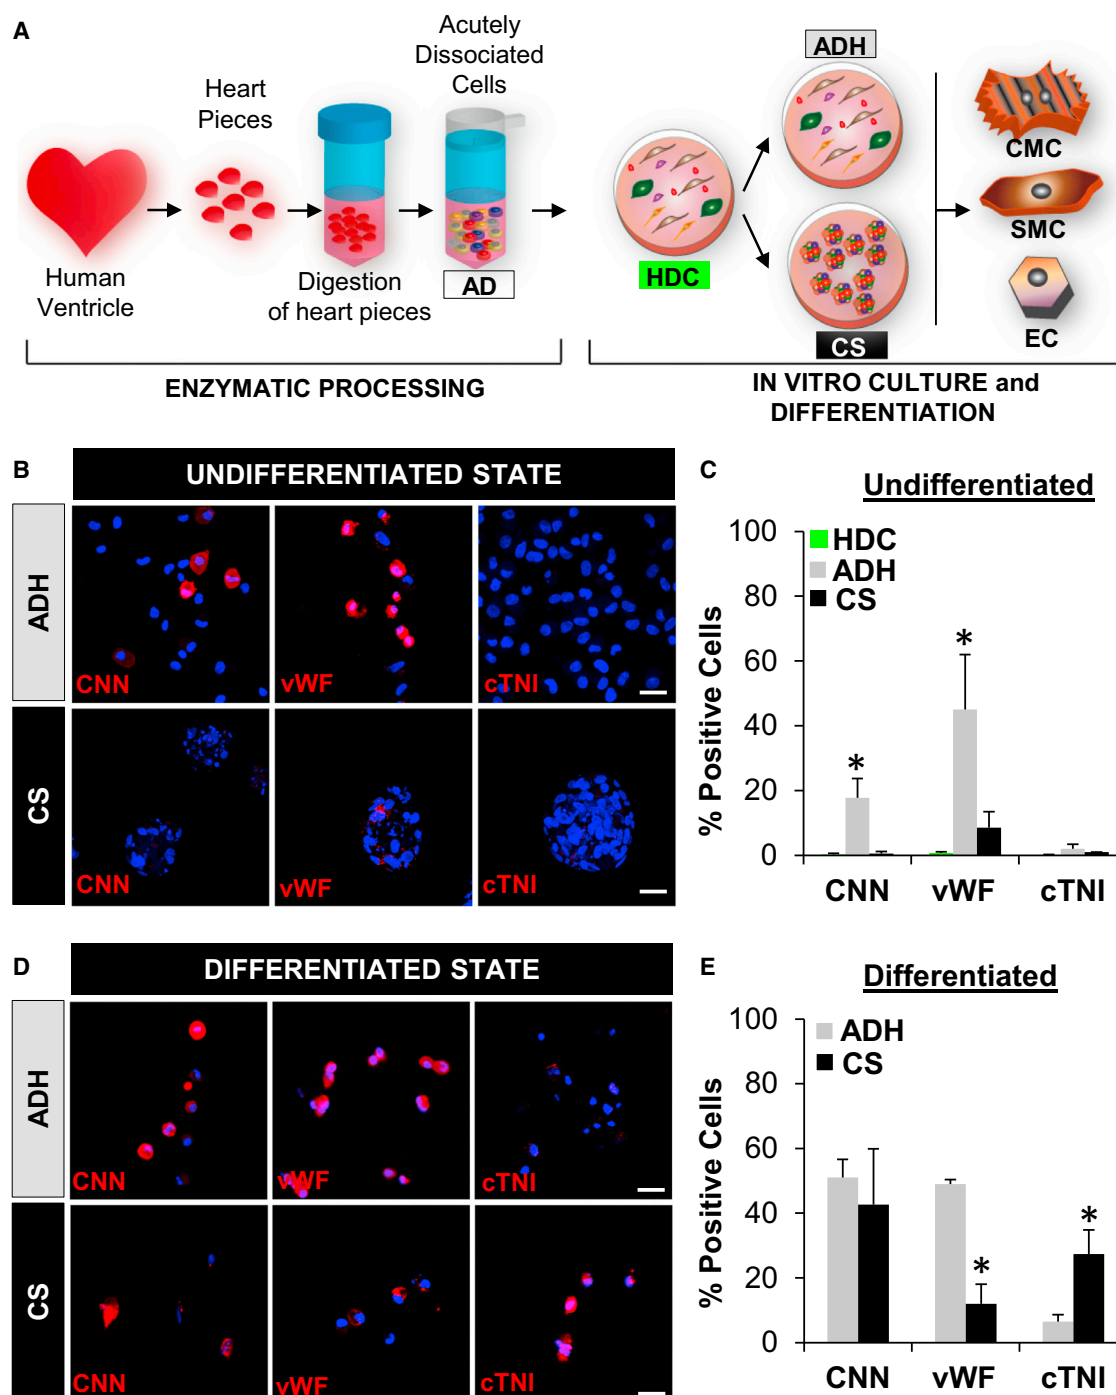

**Figure 1. Cardiovascular Differentiation Potential of Adult Human CS-Derived Cells**

(A) Experimental design. Human heart samples were minced, digested, and dissociated to single ADs. ADs were grown in primary adhesion culture that we call HDCs. After HDCs reached confluence, they were harvested and then cultured in either adhesion cultures (ADHs) or CSs. After 7 days, ADHs and CSs were induced to differentiate into CMs, SMCs, and ECs.

(B and D) Confocal imaging of ADH and CS cells immunostained with CNN, vWF, and cTNI pre- (B) and post- (D) differentiation. Nuclei were stained with DAPI (blue). Scale bars, 40 μm.

(C and E) Quantification of the number of cells positive for CNN, vWF, and cTNI from ADH and CS pre- (C) and post- (E) differentiation. Characterization of HDCs was performed as an additional control of undifferentiated progenitor/precursor cells in the primary culture (C, green bars). All experiments were performed with a minimum of three independent human heart samples. \* $p < 0.05$ .

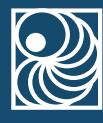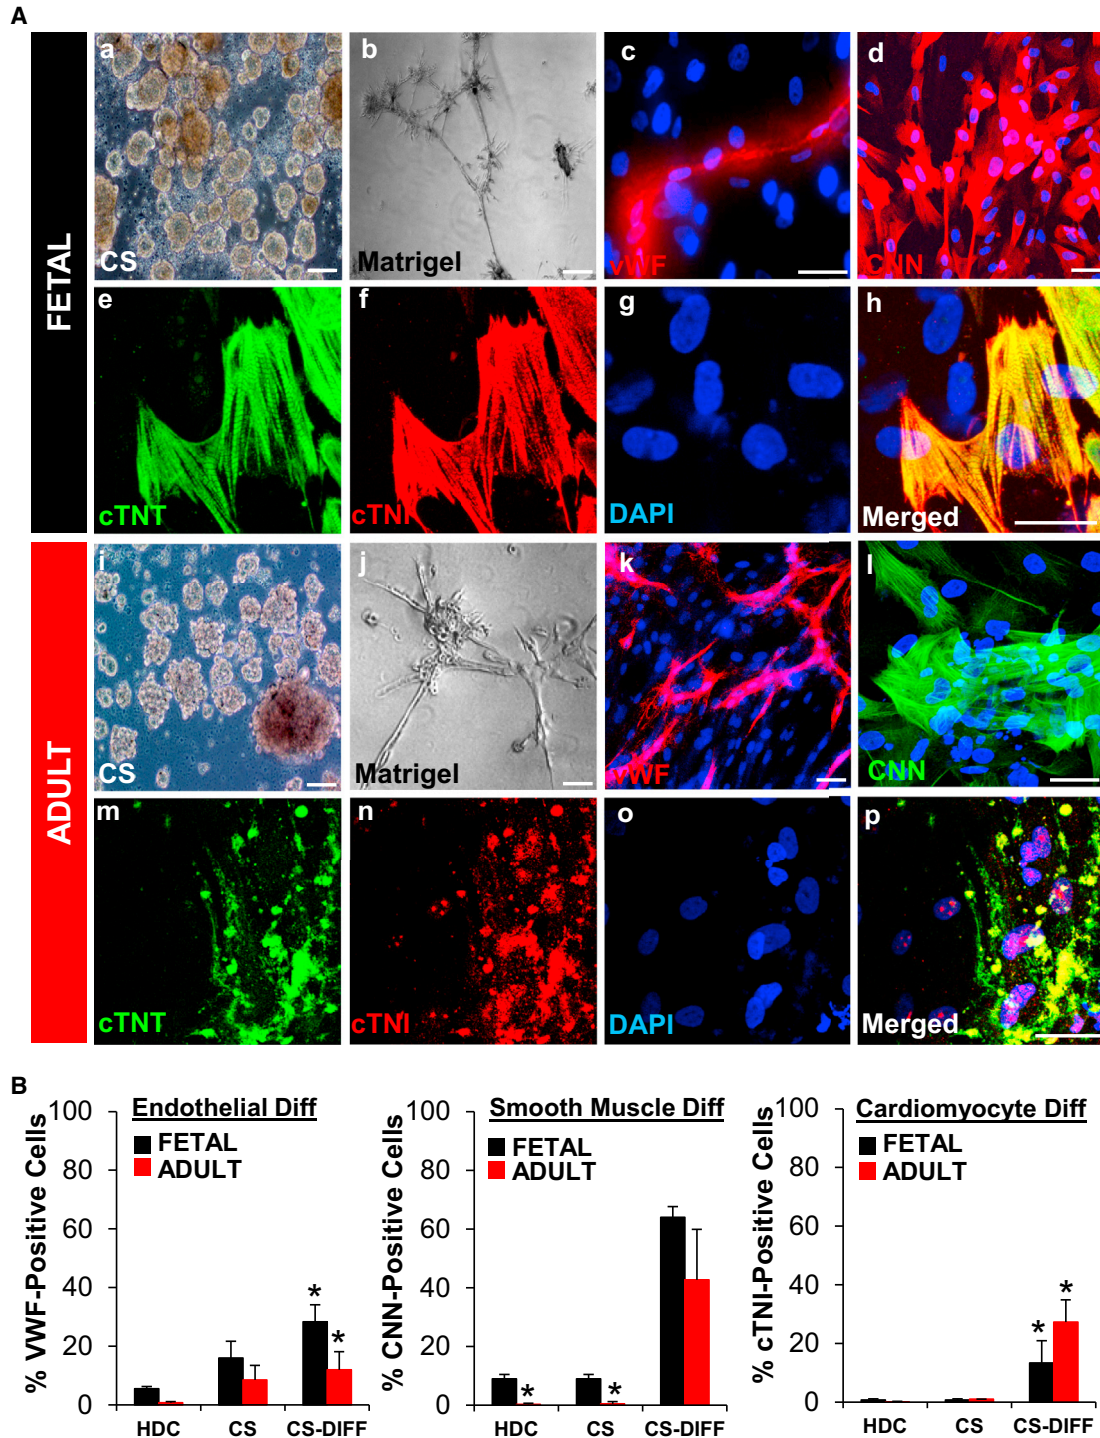

**Figure 2. Adult Human CS-Derived Cells Differentiate into Immature Cardiomyocytes**

(A) Fetal and adult HDCs formed CSs after 1 week in suspension culture (a and i). CS-derived cells formed microtubules after 24–48 hr in Matrigel angiogenesis assay (b and j). CS-derived cells were plated on coverslips treated with laminin for 15 days to induce cardiovascular differentiation. Confocal images showed expression of vWF (c and k), CNN (d and l), and cardiac proteins cTNT (green) and cTNI (red) (e–h and m–p). Sarcomeres were rare in adult CS-derived CM-like cells (m–p). Nuclei were stained with DAPI (blue). Scale bars, 40 μm. (B) Cardiovascular differentiation (Diff) of HDCs and CS-derived cells pre- and postdifferentiation was quantitated by FACS. All experiments were performed with a minimum of three independent human heart samples. \*p < 0.05.

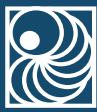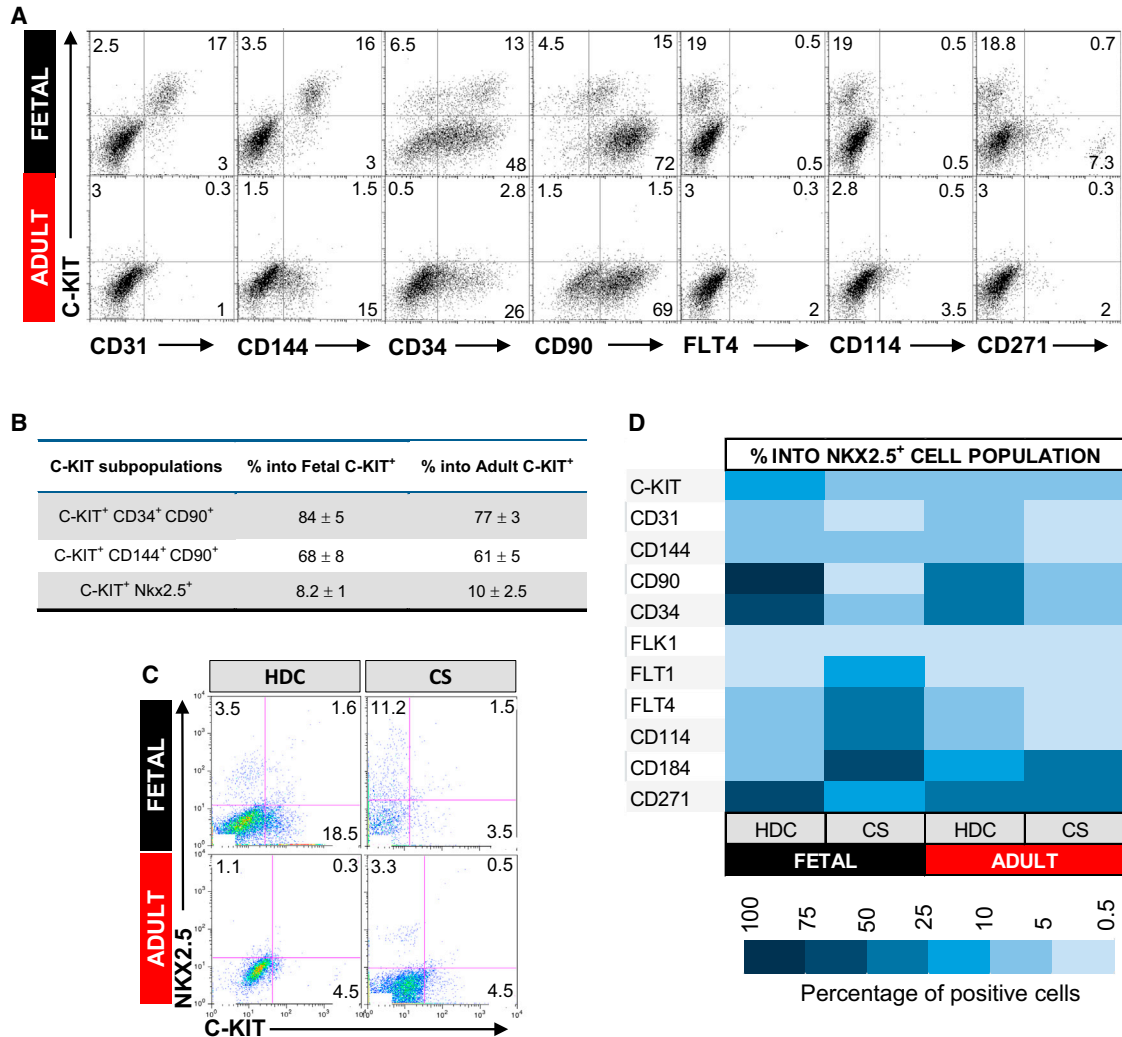

**Figure 3. Characterization of Fetal and Adult Human HDCs**

(A) HDCs were analyzed for a panel of surface markers (x axis) and C-KIT (y axis) by FACS. Percentage of total positive cells for each marker is shown in the representative dot plot graph.

(B) Percentage of C-KIT cells positive for CD34 and CD90 (hematopoietic markers), CD144 and CD90 (endothelial markers), and NKX2.5 (cardiac progenitor); n = 3.

(C) Costaining for C-KIT (x axis) and NKX2.5 (y axis) in HDCs and CS cells from fetal and adult heart. Percentage of total positive cells for each marker is shown in the representative dot plot graph.

(D) Comparative table showing the percentage of cells positive for C-KIT, CD31, CD144, CD90, CD34, FLK1, FLT1, FLT4, CD114, CD184, and CD271 within the NKX2.5 cell population from fetal and adult HDCs and CSs. All experiments were repeated with a minimum of three independent samples.

CD184 between HDCs and CS cells. The only significant difference between fetal versus adult CSs was the expression of CD184 (Figure S2).

C-KIT has been the cell surface marker most commonly used to identify human aCPCs (Bearzi et al., 2007). The C-KIT<sup>+</sup> resident population is very rare in adult compared to fetal human cells (0.3% ± 0.1% versus 5.5% ± 0.6%, respectively; p < 0.05). Interestingly, there was a 5- and 2.5-fold increase in C-KIT<sup>+</sup> cells in HDCs from adult and

fetal hearts, respectively. Because C-KIT is expressed in aCPCs, hematopoietic, mast cells, endothelial, and certain fibroblasts (Arsalan et al., 2012; Loffredo et al., 2011; Sandstedt et al., 2010), we further phenotyped these C-KIT<sup>+</sup> cardiac cells to delineate their potential origin (Figures 3A and 3B). The majority of cardiac C-KIT<sup>+</sup> cells coexpressed markers consistent with hematopoietic/EC lineages. Of the fetal and adult C-KIT<sup>+</sup> cells, 68%–85% and 61%–77%, respectively, were positive for CD34, CD90, CD31, or



CD144. We also analyzed HDCs and CS cells for the coexpression of C-KIT and NKX2.5. Only 10% of C-KIT<sup>+</sup> cells coexpressed NKX2.5 (Figures 3B and 3C). Conversely, 5%–20% of the NKX2.5<sup>+</sup> population was C-KIT<sup>+</sup> (Figure 3D). Fetal and adult NKX2.5<sup>+</sup> cells were negative for endothelial surface markers CD31 and CD144, but 50% coexpressed CD271, a neural crest marker (Figures 3D and S3). There were dramatic differences in the expression of CD90, CD34, FLT1, FLT4, and CD184 on NKX2.5<sup>+</sup> cells in fetal compared to adult CS cells (Figure 3D). Thus, C-KIT identifies a limited subset of NKX2.5<sup>+</sup> cells, and CD271 appears to capture the greatest proportion of the NKX2.5<sup>+</sup> subpopulation in both fetal and adult cells.

### Clonal Analysis of Adult CS-Derived Cells Identifies a Cell with Multilineage Potential

To determine if CS contained cells capable of complete cardiac differentiation, we dilutionally cloned adult human CS-derived cells and analyzed their phenotype (Figure 4A). A total of 16 single CS cells were clonally expanded on fibronectin-coated plates leading to homogeneous cultures with elongated, fibroblast-like morphology (Figure S4A). Seven of the clones stopped proliferating, becoming senescent in the first or second passage and were not analyzed in further assays (Figure S4B). Six of the long-term proliferative clones (ID# 2R, 5L, 7L, 5R, 4L, and 8L) were chosen for further characterization of phenotype, differentiation potential, and gene expression profile. Flow cytometry and quantitative PCR (qPCR) demonstrated that all six clones expressed CD105 (endoglin), chondroitin sulfate proteoglycan NG2, as well as weak expression for vascular growth factor receptor Flt4 (Figures 4B and 4C). In contrast, all clones were negative for endothelial markers (CD31, CD144, and FLT1), cardiac stem cell markers (FLK1 and C-KIT), neural crest stem cell marker CD271, and stem cell mobilization marker CD114. Some clones had weak expression for CD106 (7L), CD184 (7L and 8L), and CD34 (5R). CD90 separated the clones into two distinct subpopulations with differing differentiation potential. However, there was no obvious difference in morphology between clones negative for CD90 (2R, 5L, and 7L) or clones positive for CD90 (5R, 4L, and 8L) (Figure S4A).

To determine if these proliferating clones possess properties of stem or progenitor cells, we analyzed their ability to differentiate into the three cell lineages that constitute the major heart cells. All CD90<sup>-</sup> clones could differentiate into cells expressing cardiac-specific genes ( $\alpha$ -sarcomeric actinin [ $\alpha$ -actinin], 12%  $\pm$  3.7%;  $\alpha$ -myosin heavy chain [ $\alpha$ -MHC], 2.5%  $\pm$  0.7%), with 60% of the  $\alpha$ -MHC-expressing cells demonstrating sarcomeres (1.5%  $\pm$  1% of total cells; Figures 4D–4F and S4C). CD90<sup>-</sup> clones could also differentiate into SMCs (CNN, 30%  $\pm$  7.5%) and ECs (vWF, 5%  $\pm$  4%). In contrast, although some CD90<sup>+</sup> clones could express low

levels of cardiac-specific proteins ( $\alpha$ -actinin, 1%  $\pm$  0.5%, and  $\alpha$ -MHC, 0.75%  $\pm$  0.1% of total cells), they did not form mature CMs with complete sarcomeres (Figures 4D–4F). CD90<sup>+</sup> clones were at least as efficient as CD90<sup>-</sup> clones in differentiating into SMCs (CNN, 35%  $\pm$  14%) and ECs (vWF, 33%  $\pm$  14%). These data suggest that the CD90<sup>-</sup> subpopulation contains a cell with cardiogenic potential.

### Adult Human CS-Derived CD90<sup>-</sup> and CD90<sup>+</sup> Clones Display Distinct Transcriptional Profiles

To characterize gene expression in CD90<sup>-</sup> versus CD90<sup>+</sup> clones, we assayed the expression of aCPC candidate genes. *ISL-1* was 10.5-fold elevated in CD90<sup>-</sup> versus CD90<sup>+</sup> clones (Figure 5A;  $p < 0.05$ ). In contrast, expression of fibroblast/myofibroblast gene Periostin was 3.9-fold higher, respectively, in CD90<sup>+</sup> versus CD90<sup>-</sup> clones (Figure 5A;  $p < 0.05$ ), suggesting a fundamentally different phenotype between the two type of clones. To examine genome-wide expression patterns, we performed next-generation RNA sequencing (RNA-seq). The gene expression profiles of 22,449 genes were examined after removal of duplicate genes following transcript aligning. The low number of CD90 transcripts in the negative versus positive clones confirmed phenotypes of samples (Figure S5). Hierarchical clustering analysis further revealed the molecular difference between the CD90<sup>-</sup> and CD90<sup>+</sup> clones (Figure 5B). A total of 272 genes were differentially expressed in CD90<sup>-</sup> versus CD90<sup>+</sup> clones, of which 133 genes were upregulated and 139 downregulated in CD90<sup>-</sup> as compared to CD90<sup>+</sup> (Table S1). The fold change of major genes differentially upregulated (red) and downregulated (green) in CD90<sup>-</sup> versus CD90<sup>+</sup> clones is shown in Figure 5C.

To better characterize the molecular basis of the cellular phenotypes and differentiation potential of CD90<sup>-</sup> and CD90<sup>+</sup> clones, we used Gene Ontology (GO) enrichment analysis and canonical pathway analysis to functionally annotate and predict the biological roles of these genes (Figure 5D; Tables S2 and S3). Biological processes that were preferentially represented in the CD90<sup>-</sup> clones were those associated with embryonic morphogenesis, muscle cell development, proliferation, and telomere maintenance consistent with progenitor-like behavior (Table S2). The most enriched pathway in CD90<sup>-</sup> clones was the Oct4 and mammalian embryonic stem cell pluripotency pathway (CCNE, PHC1, NR2F6, and ASH2L) (Campbell et al., 2007). In contrast, upregulated genes in CD90<sup>+</sup> clones point to networks and pathways of filament-forming cytoskeletal and motility and migration of activated fibroblasts (PAK4, SEPT1, MMP2, and FAP) (Abo et al., 1998; Stawowy et al., 2004; Howard et al., 2012). Transcriptome profiling suggests that human CD90<sup>-</sup> CS-derived clones are enriched in expression of genes related to stemness, whereas CD90<sup>+</sup> clones were enriched with fibroblast-associated genes.

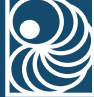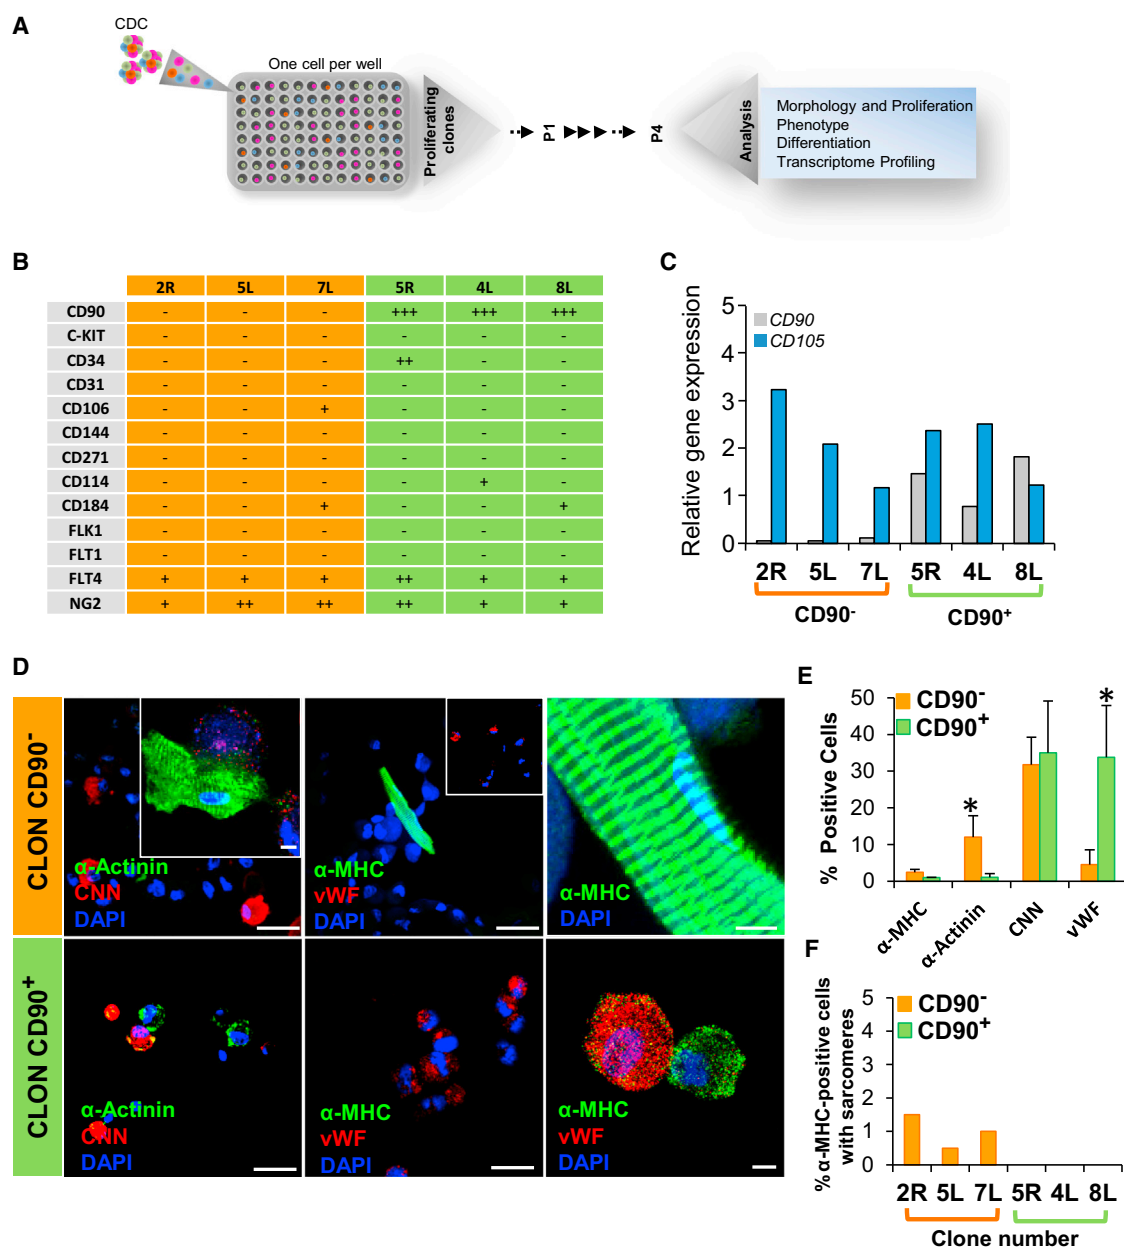

#### Figure 4. CD90<sup>-</sup> CS-Derived Clones Are Multipotent, Giving Rise to Mature CMs

- (A) Schematic diagram outlining the strategy for cloning and analysis of CS-derived cells.  
 (B) Characterization for cell surface markers on long-term proliferative CS-derived clones by FACS (n = 6 clones).  
 (C) Quantitative RT-PCR analysis of CD90 and CD105 expression in long-term proliferative CS-derived clones (n = 6). \*p < 0.05.  
 (D) CS-derived clones were differentiated and immunostained for  $\alpha$ -actinin ( $\alpha$ -SA) and CNN or  $\alpha$ -MHC, and vWF and imaged by confocal microscopy. Nuclei were stained with DAPI (blue). Scale bars, 40  $\mu$ m and 5  $\mu$ m (inset).  
 (E) FACS quantification of  $\alpha$ -MHC,  $\alpha$ -SA, CNN, and vWF in CD90<sup>-</sup> and CD90<sup>+</sup> clones (n = 6). \*p < 0.05.  
 (F) Percentage of cardiomyocytes with mature sarcomere formation from CD90<sup>-</sup> (orange bars) and CD90<sup>+</sup> (green bars) clones (n = 6).

#### Adult CD90<sup>-</sup> CS-Derived Cells Have Limited Capacity to Differentiate into More Mature CMs

To determine how specific the lack of CD90 expression may be for the identification of aCPCs in CSs, we isolated and

cloned directly by fluorescence-activated cell sorting (FACS) CD90<sup>-</sup> and CD90<sup>+</sup> adult human CS-derived cells (Figure S6A). Purity of individual clones was confirmed, and 21 CD90<sup>-</sup> clones and 24 CD90<sup>+</sup> clones were recovered.

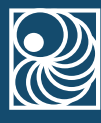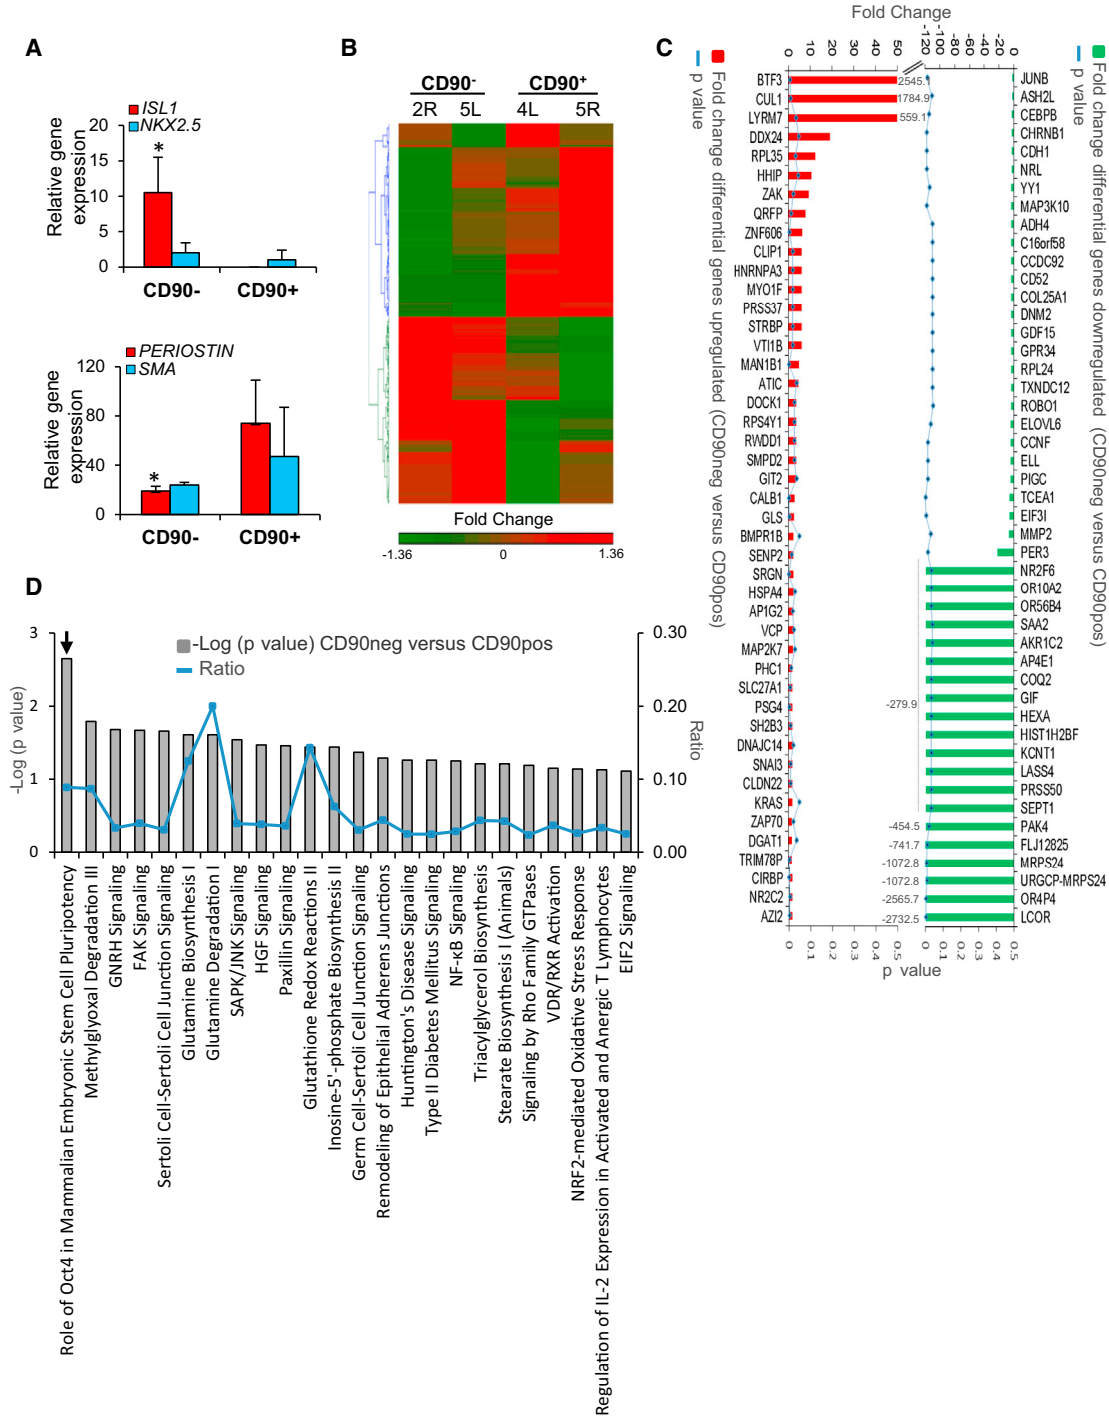

**Figure 5. Transcriptome Profile of CS-Derived Clones**

(A) Quantitative real-time PCR analysis for *ISL1*, *NKX2.5*, Periostin, and *SMA* in CD90<sup>-</sup> and CD90<sup>+</sup> CS-derived clones.  
 (B) Hierarchical clustering analysis of the four CS-derived clones. Differential gene expression was determined using the mean for each sample of CD90<sup>-</sup> clones versus CD90<sup>+</sup> clones. Hierarchical clustering analysis was performed using Partek Genomic Suite software.  
 (C) Differential expression of genes upregulated (red) and downregulated (green). Blue line represents p value of <0.05.  
 (D) Pathway analysis using ingenuity pathway analysis (IPA). Significant enrichment of canonical pathways in CD90<sup>-</sup> samples versus CD90<sup>+</sup> samples (gray bars) is shown. Blue line represents ratio.  
 n = 6; \*p < 0.05.



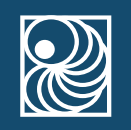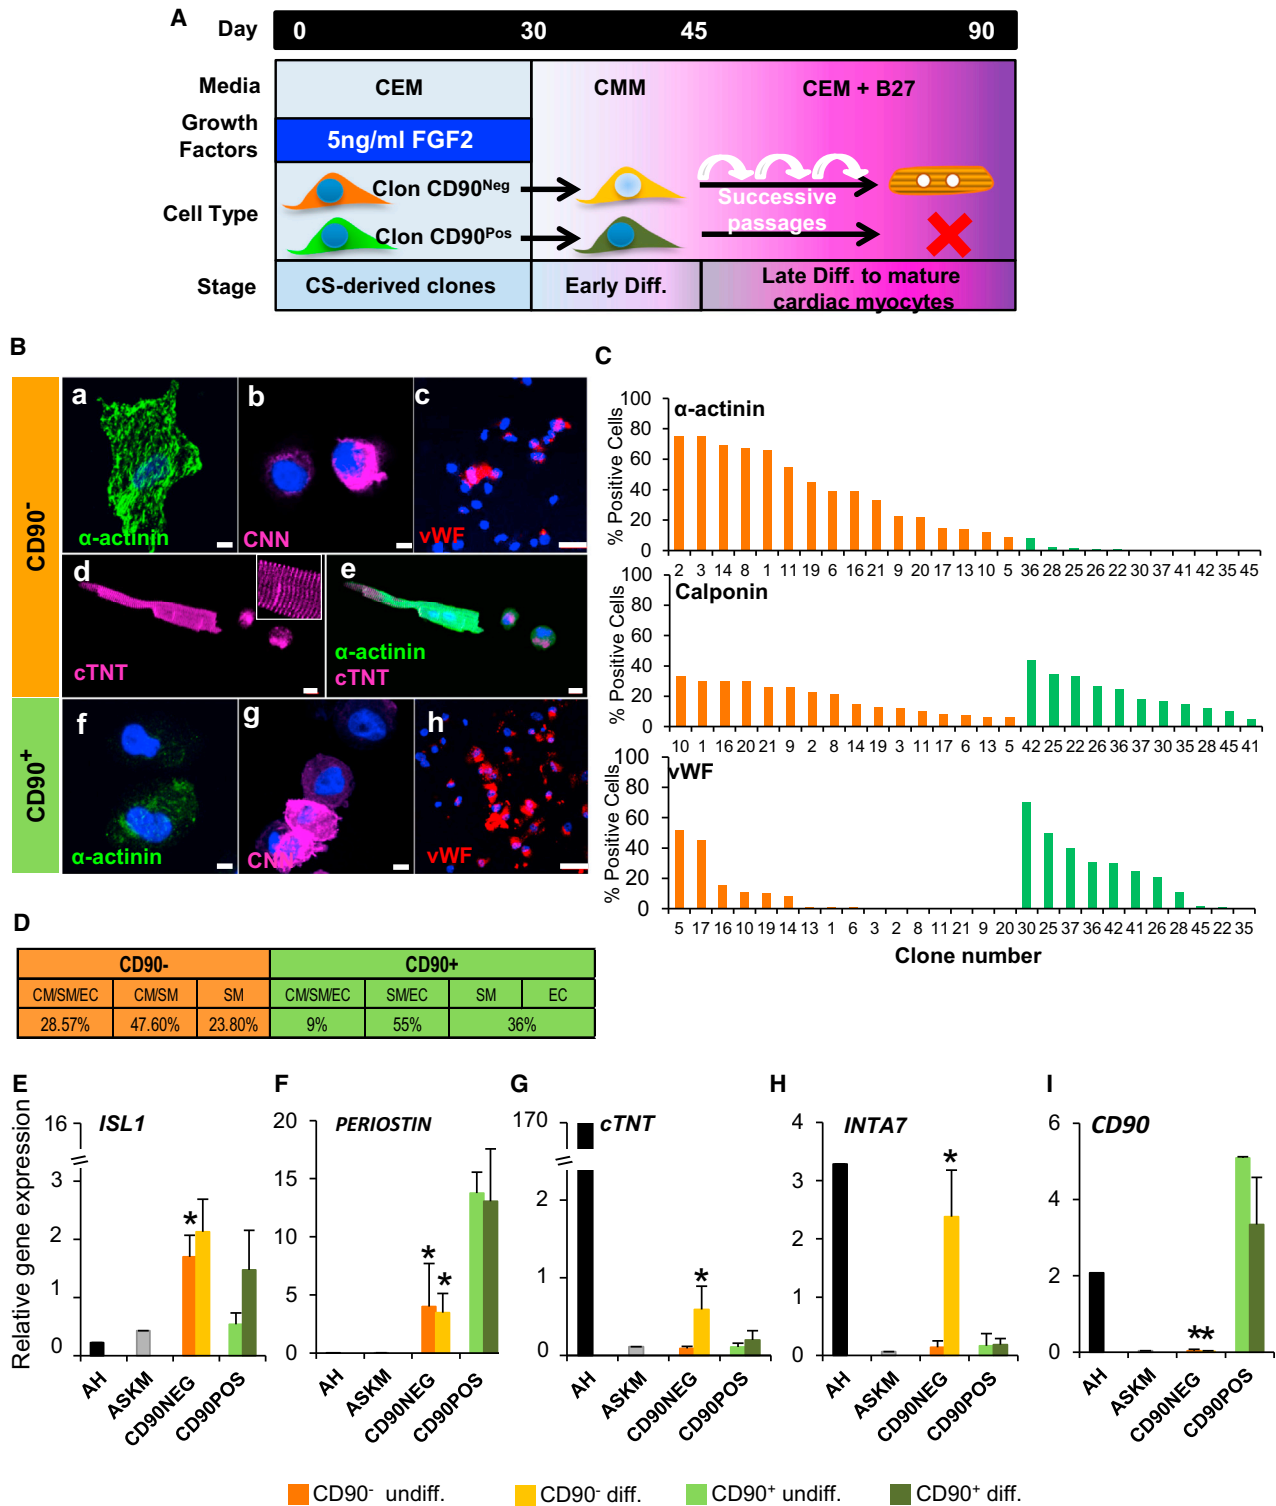

**Figure 6. Absence of CD90 Expression Identifies a Population of Cells Containing an aCPC-like Cell**

(A) Schematic diagram outlining culture conditions.

(B) CS-derived clones were differentiated and immunostained for  $\alpha$ -actinin (a and f), CNN (b and g), and vWF (c and h) and imaged by confocal microscopy. Only CD90<sup>-</sup> CS-derived clones give rise to myocytes with sarcomeres (d and e) costained with  $\alpha$ -actinin and cTNT. Nuclei were stained with DAPI (blue). Scale bars, 50  $\mu$ m and 10  $\mu$ m (inset).

(legend continued on next page)



Of CD90<sup>+</sup> clones, 79.1% stopped proliferating within 30 days in culture in contrast to only the 47.6% of CD90<sup>-</sup> clones (Figures S6B and S6C). Long-term proliferative CD90<sup>-</sup> and CD90<sup>+</sup> clones grew with a doubling time between 36 and 72 hr (Figure S6C, right). A total of 21 CD90<sup>-</sup> and 11 CD90<sup>+</sup> clones were chosen for further characterization of differentiation potential and gene expression profile before and after differentiation (scheme in Figure 6A). Of CD90<sup>-</sup> clones, 28.5% (6 of 21 total CD90<sup>-</sup> clones: #5, #10, #14, #16, #17, and #19) were tripotent for the 3 cell lineages (Figures 6Ba–6Bc, 6C, and 6D), 47.6% of CD90<sup>-</sup> clones were bipotent for myogenic lineages (CM and SMC), and the remaining 23.8% of CD90<sup>-</sup> clones were unipotent for SMCs (Figures 6C and 6D). Of 21 CD90<sup>-</sup> clones analyzed, 16 were cardiomyogenic, expressing  $\alpha$ -actinin (Figures 6C and S6D), whereas only 1 CD90<sup>+</sup> clone of 11 clones was tripotent (clone number #36), with less than 5%  $\alpha$ -actinin-positive cells, 55% of CD90<sup>+</sup> clones differentiated into vascular lineages (SMC and EC), and 36% of CD90<sup>+</sup> clones were unipotent (3 clones for SMCs [#22, #35, and #45] and 1 clone for ECs [#41]) (Figures 6Bf–6Bh and 6C). After 90 days in culture, some CD90<sup>-</sup> clones went on to form more mature CMs with complete sarcomeres but at a low rate (<1%) (Figures 6Bd and 6Be). Sarcomere formation was never seen with CD90<sup>+</sup> clones.

We determined the expression of candidate genes in CD90<sup>-</sup> versus CD90<sup>+</sup> clones. *ISL-1* mRNA was elevated 4-fold in undifferentiated CD90<sup>-</sup> clones, whereas Periostin was 3-fold elevated in CD90<sup>+</sup> clones. Late CM gene cTNT was elevated 2-fold in CD90<sup>-</sup> clones after differentiation, but no increase was observed in CD90<sup>+</sup> clones (Figure 6G). We also analyzed expression of integrins associated with maturation of cardiomyocytes (Maitra et al., 2000). Integrin  $\alpha 7$  (INTA7) was elevated 6-fold in differentiated CD90<sup>-</sup> clones versus CD90<sup>+</sup> clones (Figure 6H). Integrin  $\alpha 5$  (INTA5) was expressed at similar levels in both clones (Figure S6E). Skeletal muscle differentiation could not explain our results because myogenin expression was not observed before or after differentiation in CD90<sup>-</sup> and CD90<sup>+</sup> clones (Figure S6F). Expression of CD90 did not change with differentiation (Figure 6I).

To confirm that the CD90<sup>-</sup> population contains an aCPC, we made CS directly from sorted CD90<sup>-</sup> and CD90<sup>+</sup> fractions obtained from fetal HDCs (Figure 7A). CS-derived cells from the CD90<sup>-</sup> fraction were more cardiogenic and more likely to undergo complete CM differenti-

ation (Figures 7B–7D): cTNI, 10%  $\pm$  8% versus 2.6%  $\pm$  1.5% and 2.3%  $\pm$  1.5% for CD90<sup>-</sup> versus CD90<sup>+</sup> and unsorted cells, respectively ( $p < 0.05$ ); cTNT, 25%  $\pm$  11% versus 6.9%  $\pm$  3.7% and 11%  $\pm$  4% for CD90<sup>-</sup> versus CD90<sup>+</sup> and unsorted cells, respectively ( $p < 0.05$ ).

## DISCUSSION

Tissue-specific stem or progenitor cells are notoriously difficult to expand and propagate in vitro in an undifferentiated state. Various culture systems have been developed in an attempt to maintain stemness in these cells, including a 3D culture system based on sphere formation. We utilized CS generated from fetal and adult hearts to attempt to identify an aCPC that has the capacity to differentiate into CMs, SMCs, and ECs. Fetal and adult CS-derived cells differentiated into vascular lineages like SMCs and ECs with similar efficiencies. However, whereas functional CMs were easily derived from fetal CS, the majority of adult CS-derived CMs did not form sarcomeres or exhibit calcium cycling despite expression of relevant cardiac-specific genes. We cloned cells from adult CS and demonstrated two distinct populations of cells with differing cardiovascular differentiation potential. The first cell type has properties consistent with a CPC (CD90<sup>-</sup>/*ISL1*<sup>hi</sup>/*Periostin*<sup>lo</sup>), including potential to differentiate into more mature CMs, although the percentage of mature CMs obtained was very low (<1%). This was not simply a technical issue related to our differentiation conditions because multiple published protocols were tested (Figures S7A–S7C). Likewise, the fact that cells isolated from CS, which were derived directly from CD90<sup>-</sup> cells, demonstrated cardiogenic differentiation suggests that CM dedifferentiation cannot explain these results. Although these results support the conclusion that CSs contain an aCPC with cardiogenic potential, it is unlikely that this differentiation could explain any therapeutic effect given its rarity. Furthermore, the explanation for why formation of mature CMs occurs at such a low efficiency even from clones with cardiogenic potential is unclear. Whether it is related to limitations of the artificial in vitro differentiation conditions or represents a block to differentiation in these cells will require further studies. Regardless, generation of sufficient aCPCs in vitro to regenerate injured hearts will require the discovery of novel techniques to expand and differentiate these cells.

(C) Quantification of  $\alpha$ -actinin, CNN, and vWF in CD90<sup>-</sup> (16 clones) and CD90<sup>+</sup> (11 clones) CS-derived clones.

(D) Differentiation potential of CD90<sup>-</sup> and CD90<sup>+</sup> CS-derived clones: tripotent (CM/SMC/EC lineages), bipotent (CM/SM; SMC/EC lineages), or unipotent (SMC or EC lineages).

(E–I) Quantitative real-time PCR analysis for *ISL-1*, *cTNT*, *INTA7*, *Periostin*, and *CD90* in CD90<sup>-</sup> and CD90<sup>+</sup> CS-derived clones ( $n = 26$ ). \* $p < 0.05$ . undiff., undifferentiated.

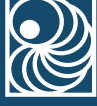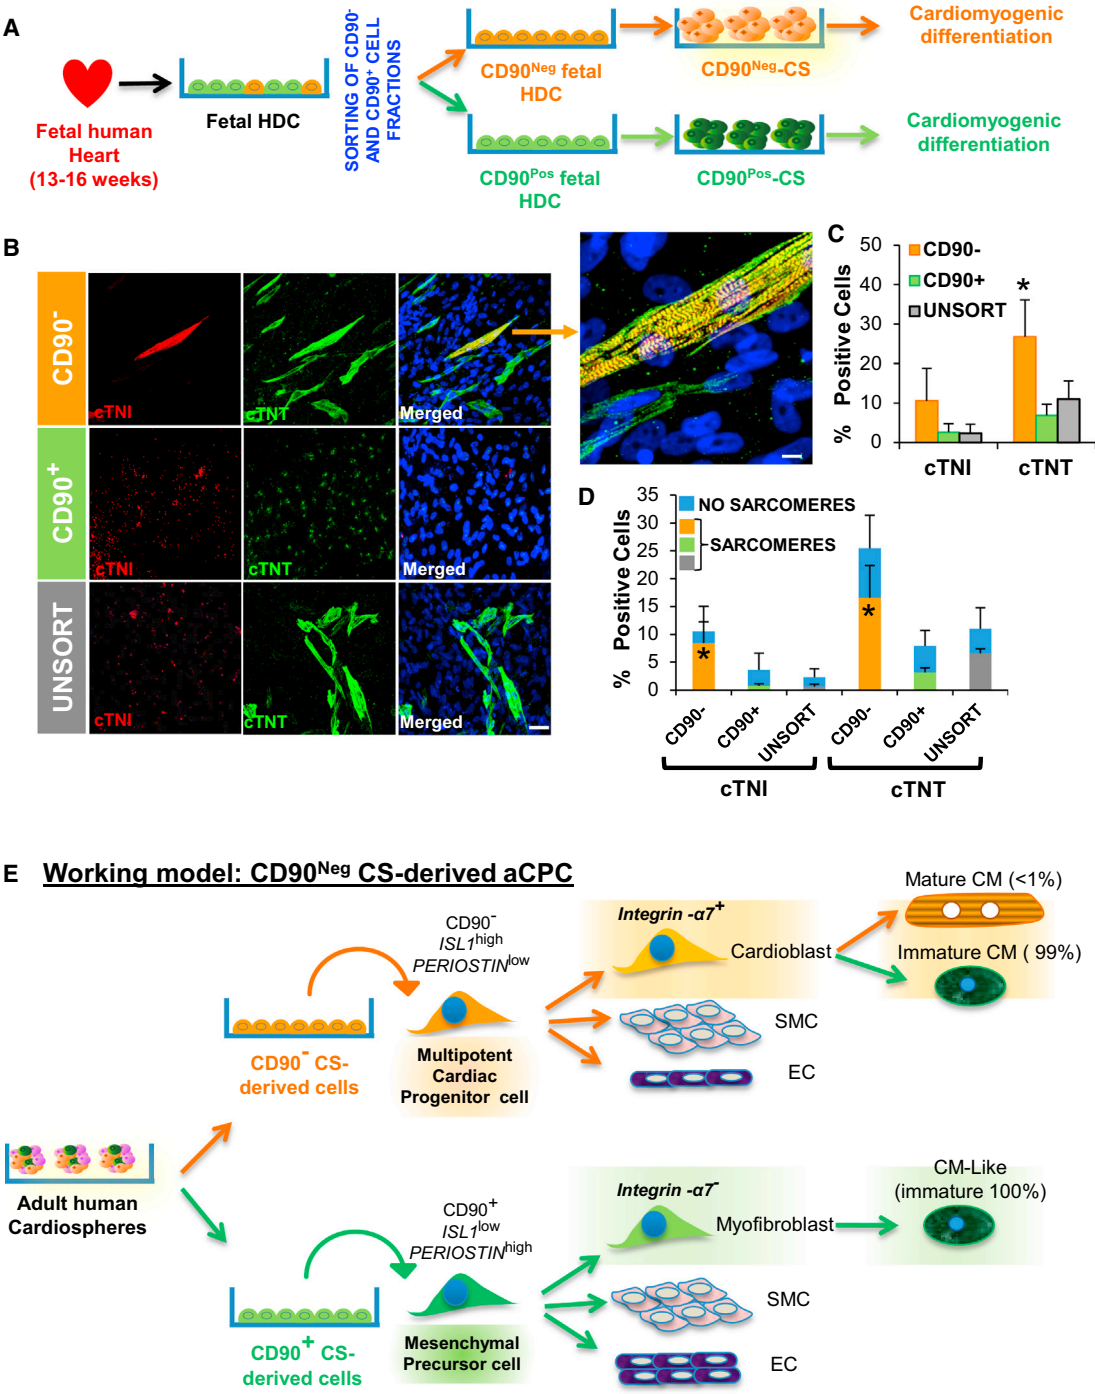

**Figure 7. The CD90<sup>-</sup> Cell Fraction from Fetal Human Hearts Is Enriched in CPCs with Capacity to Differentiate into Mature Cardiomyocytes**

(A) CD90<sup>+</sup> versus CD90<sup>-</sup> subpopulations were sorted from fetal HDCs.  
 (B) After CS formation and differentiation of CD90<sup>+</sup>, CD90<sup>-</sup>, and unsorted (UNSORT) cell fractions, the cells were stained for cardiomyocyte proteins cTNI (red) and cTNT (green). Nuclei were counterstained with DAPI (blue). Scale bars, 40 μm.  
 (C) Quantification of the percentage of cells positive for cTNI and cTNT after differentiation. \*p < 0.05.  
 (D) Quantification of the percentage of cTNI and cTNT<sup>+</sup> cells with (orange bars) or without (black bars) sarcomere formation. All experiments were performed on three independent human heart samples. \*p < 0.05.

(legend continued on next page)



The second cell type appeared to be a cardiac mesenchymal/fibroblast-like cell that was CD90<sup>+</sup>/*ISL1*<sup>low</sup>/*Periostin*<sup>hi</sup> and capable of forming SMCs and ECs and partial differentiation into cardiac protein-expressing cells without sarcomere formation. CD90<sup>+</sup> clones demonstrated higher expression of fibroblast-associated genes including Periostin compared to CD90<sup>-</sup> clones. Periostin is the marker most commonly used to identify cardiac fibroblasts (Norris et al., 2008; Snider et al., 2009). Multipotent human fibroblasts have been described in other tissues such as dermis (Chen et al., 2007), but in this study we describe a multipotent cardiac fibroblast (CD90<sup>+</sup>/*Periostin*<sup>+</sup>) in the human heart. These data are consistent with multiple studies that have described “cardiac progenitor/precursor cells” from multiple tissues such as heart (Simpson et al., 2012), bone marrow (Deb et al., 2003; Toma et al., 2002), adipose tissue (Fraser et al., 2006; Armiñán et al., 2009), or dental pulp (Armiñán et al., 2009) that undergo incomplete cardiac differentiation. This has also been observed in other systems because human embryonic stem cell-derived mesenchymal progenitors express cardiac markers but do not form contractile cardiomyocytes (Raynaud et al., 2013; Ramkisoensing et al., 2011). Given the presence of cells in the adult heart with incomplete cardiogenic potential, which are not true CPCs, the ability to form sarcomeres and display calcium cycling should be an essential component for defining an “authentic” cardiac progenitor cell.

Human CS-derived CD90<sup>-</sup> clones are multipotent and could form mature CMs. These cells displayed a distinct cell surface marker phenotype and a unique stem cell-like transcriptome. Clones negative for CD90 also expressed cardiac progenitor transcription factors *NKX2.5* and *ISL-1* (Bu et al., 2009; Moretti et al., 2006; Wu et al., 2006). These results are in concordance with earlier studies suggesting that a SCA1<sup>+</sup> cardiogenic subpopulation in CS-derived cells is enriched for *Isl1* expression (Ye et al., 2012). In fact, genome-wide expression analysis using next-generation sequencing revealed differential gene expression in CD90<sup>-</sup> clones involved in pluripotency and stemness (Pardo et al., 2010). Interestingly, we observed a dramatic increase in *INTA7* expression in CD90<sup>-</sup> clones with differentiation.  $\alpha 7$ -integrin forms a heterodimer with  $\beta 1$ -integrin in terminal-differentiated cardiomyocytes in heart development and is progressively increased in adult stage (Maitra et al., 2000). The importance of the integrin receptor,  $\alpha 7\beta 1$ , in the correct assembly of cytoskeleton proteins to form mature and functional CMs is an important unresolved issue.

CD90<sup>-</sup> and CD90<sup>+</sup> clones share expression of some mesenchymal genes such as *NG2*, *CNN*, and *CD105*. Whether this indicates two cell types representing different developmental stages of a similar mesenchymal precursor will need to be determined. The exact identity of the CS-derived CD90<sup>-</sup> aCPC remains to be determined. Although C-KIT has been reported to identify resident cardiac stem cells (Bearzi et al., 2007; Beltrami et al., 2003), it was not expressed on most *NKX2.5*<sup>+</sup> cells in CSs nor was it expressed on the CD90<sup>-</sup> cardiogenic clones we analyzed. Conversely, the majority of C-KIT<sup>+</sup> cells in fetal and adult hearts did not express *NKX2.5*. Our results suggest that the majority of the C-KIT population in human heart expresses markers consistent with a hematopoietic/endothelial lineage (C-KIT<sup>+</sup>/CD90<sup>+</sup>/CD34<sup>+</sup>; C-KIT<sup>+</sup>/CD90<sup>+</sup>/CD144<sup>+</sup>). C-KIT<sup>+</sup>/CD90<sup>-</sup> CS-derived cells were cardiogenic, but they did not demonstrate sarcomere formation (Figures S7D and S7E). Consistent with our results, it has been reported that unselected human CS-derived cells are functionally superior to C-KIT<sup>+</sup>/CD90<sup>-</sup> or CD90<sup>+</sup> purified CS-derived cells (K. Cheng et al., 2012, *Circulation*, abstract; R.R. Smith et al., 2008, *Circulation*, abstract). Whether C-KIT<sup>+</sup>/*NKX2.5*<sup>+</sup> cells represent the endogenous aCPC and the CD90<sup>-</sup>/C-KIT<sup>-</sup>/*NKX2.5*<sup>low</sup> we cloned are related or this CD90<sup>-</sup>/C-KIT<sup>-</sup>/*NKX2.5*<sup>low</sup> clone is a unique CPC is impossible for us to determine because identification of *NKX2.5*<sup>+</sup> cells required fixing and permeabilizing the cells. The neural crest marker CD271 was able to identify the largest proportion of the *NKX2.5* population in the heart but was not expressed on our CD90 clones. Resolution of this issue will require identifying additional cell surface markers so that endogenous, live cells can be isolated directly. Interestingly, dramatic changes in the expression of surface markers including C-KIT were observed in cell culture. The surface marker changing most dramatically was CD90, decreasing from 80% to 10% in fetal and 40% to 10% in adult freshly dissociated cells to CSs, respectively (Figure S2). An epithelial-to-mesenchymal transition mechanism has been reported to occur within CS that is associated with downregulation of CD90 expression (Forte et al., 2012). Thus, whether the CS-derived CD90<sup>-</sup> aCPC clones we isolated exist endogenously in human hearts or are a byproduct of the CS culture system remains to be determined.

Taken together, these findings suggest a working model to define CS-derived cell lineages with cardiovascular differentiation potential from the adult human heart (Figure 7E). In this model, CD90 expression segregates adult human CS-derived cells with differing cardiomyogenic

(E) Working model of CS-derived cell lineages from adult human heart. CD90 differentiates adult human CS-derived cells with differing cardiomyogenic differentiation; CD90<sup>-</sup>/*ISL-1*<sup>hi</sup>/*Periostin*<sup>lo</sup> with limited potential to differentiate into CMs with sarcomere formation along with ECs and SMCs and a cardiac mesenchymal/fibroblast cell that was CD90<sup>+</sup>/*ISL-1*<sup>low</sup>/*Periostin*<sup>hi</sup> capable of partial differentiation into CM-like cells without sarcomere formation (CM-like immature), ECs, and SMCs.

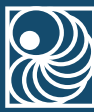

differentiation. Our study suggests the presence of a “true” adult CPC versus a mesenchymal/myofibroblast cell that can express cardiac proteins but not differentiate into a true CM.

## EXPERIMENTAL PROCEDURES

### Derivation of Primary Cardiac Cell Culture from Human Heart Samples

A total of 32 human biopsies were obtained from 32 donors (16 fetal and 16 adult). Fetal heart tissue was harvested under the supervision of the UCLA institutional review board, and adult human heart tissue was harvested from discarded pathological specimens at the time of heart transplantation under the supervision of the UCLA institutional review board or at the time of left ventricular assist device (LVAD) placement under the supervision of the UW institutional review board (Table S4). Biopsies were stored in Ca<sup>2+</sup>/Mg<sup>++</sup>-free Dulbecco's PBS (DPBS; Cellgro) supplemented with 2% penicillin/streptomycin (P/S) and processed at a maximum of 4 hr postsurgery. Further details of heart dissociation and primary culture of HDCs are described in the Supplemental Experimental Procedures.

### Generation of CS

Confluent HDCs were washed with DPBS, trypsinized with a 0.1% trypsin solution (Sigma-Aldrich) for 4 min at 37°C, neutralized with serum, centrifuged at 1,200 rpm for 5 min, and finally resuspended in CS growth media (CGM): 70% DMEM:F12 1:1 (Invitrogen)/30% IMDM (Lonza), 0.001% 2-mercaptoethanol (Sigma-Aldrich), 40 nM thrombin (Sigma-Aldrich), 40 nM cardiotrophin (PeproTech), 2% B27 (Gibco), 10 ng/ml epidermal growth factor (EGF; R&D Systems), 20 ng/ml basic fibroblast growth factor (bFGF; PeproTech), and antibiotics and L-glutamine into 0.8% methylcellulose (R&D Systems). Cells were seeded at a density of 25,000 cells/cm<sup>2</sup> in an untreated 60 mm culture dish (BD Falcon). Every 48 hr, EGF and bFGF were added to the culture medium. For ADH cultures, the pellet was resuspended and cultured at a density of 5,000 cells/cm<sup>2</sup> in T-75 culture flasks (BD Falcon) precoated with fibronectin (20 µg/ml) in growth media (Figure 1A).

### Cardiovascular Differentiation In Vitro

Primary CS (5–10 U) or ADHs (10,000 cells/cm<sup>2</sup>) were seeded on 12-mm-diameter laminin-coated (Sigma-Aldrich) coverslips (Menzel-Gläser, <http://www.menzel.de>). Four distinct differentiation media were used for cardiovascular differentiation: *basal medium*, *cardiomyogenic medium*, *smooth-muscle medium*, and *endothelial medium*. For EC tube formation assay, we followed the BD protocol (BD Matrigel matrix catalog number 354234). All differentiation experiments were performed for 2–3 weeks, replacing differentiation media every 3 days. Further details are described in the Supplemental Experimental Procedures.

### Immunofluorescence in Cover Slides and Cytospin

We performed immunofluorescence as described in the Supplemental Experimental Procedures. All slides were analyzed by

confocal microscopy (LEIKA SP2 1P-FCS Confocal and NIKON A1R Confocal).

### Calcium Fluorescence Imaging

Cell cultures were incubated with the fluorescent calcium indicator dye Fluo-4 AM (10 µM; Invitrogen) and nonionic surfactant Pluronic F-127 (0.02%; Invitrogen) in cardiomyogenic medium. Spontaneous calcium fluorescence activity was imaged and recorded. Further details are described in the Supplemental Experimental Procedures.

### Flow Cytometry

We performed FACS analysis as described in the Supplemental Experimental Procedures. Data were acquired in a FACS LSRII flow cytometer (BD Biosciences). Gating strategy is described in Figure S1. FACSDIVA software (BD Biosciences) was used for acquisition of data. For later analyses, we used FlowJo software (version 7.6.5).

### Cell Sorting

We performed FACS as described in the Supplemental Experimental Procedures. Sorting experiments were done on a FACSAria III cell sorter (BD Biosciences), at low sheath pressure and by using a nozzle of 80 µm in diameter.

### Clonal Assay

CS-derived cells were trypsinized and centrifuged. Pellet was resuspended in growth medium, and cell number was determined using a hemocytometer. We performed clonal assay as described in the Supplemental Experimental Procedures. All the cells from individual clones were analyzed by FACS flow cytometer, RNA isolation for qPCR and RNA-seq, and for differentiation potential.

### RNA Isolation and Quantitative Real-Time-PCR

We performed RNA isolation and quantitative real-time PCR as described in the Supplemental Experimental Procedures.

### RNA-Seq

We performed whole-genome transcriptomic analysis as described in the Supplemental Experimental Procedures.

### Statistical Analyses

Results are presented as the mean ± SEM of a number (n) of independent experiments. p values were calculated using GraphPad software. Differences in multiple groups were evaluated using ANOVA. Correlation was deemed significant at the p < 0.05 level (two tailed).

## SUPPLEMENTAL INFORMATION

Supplemental Information includes Supplemental Experimental Procedures, seven figures, four tables, and two movies and can be found with this article online at <http://dx.doi.org/10.1016/j.stemcr.2014.03.003>.



## AUTHOR CONTRIBUTIONS

N.G.-L. carried out, designed, analyzed experiments, and wrote the manuscript. O.A. carried out heart-processing and immunofluorescence experiments. C.K. carried out calcium-imaging assays. Y.Z. analyzed RNA-seq experiments. A.N., D.L., and A.S.-O. carried out clinical work. W.R.M. designed and supervised this work and edited the manuscript.

## ACKNOWLEDGMENTS

We thank Iris Williams (Flow Cytometry Core Laboratory at UCLA), Matt Schibler (CNSI Advanced Light Microscopy/Spectroscopy Facility, UCLA, CA), Ron Seifert (ISCRM Lynn and Mike Garvey Cell Imaging Laboratory, UW, WA), and Jeffrey Boyd (ISCRM Flow Cytometry Core, UW, WA) for their technical assistance. As well, we thank the Genome Technology Access Center at Washington University for assistance with next-generation sequencing experiments. Kyohei Oyama, Daniel El-Nachef, and Ander Izeta provided helpful experimental suggestions and comments on the manuscript. This work was supported by grants from the NIH (R01 HL70748 to W.R.M. and R01HL094384 to A.S.-O.).

Received: November 5, 2013

Revised: March 5, 2014

Accepted: March 7, 2014

Published: April 17, 2014

## REFERENCES

- Abo, A., Qu, J., Cammarano, M.S., Dan, C., Fritsch, A., Baud, V., Belisle, B., and Minden, A. (1998). PAK4, a novel effector for Cdc42Hs, is implicated in the reorganization of the actin cytoskeleton and in the formation of filopodia. *EMBO J.* *17*, 6527–6540.
- Armiñán, A., Gandía, C., Bartual, M., García-Verdugo, J.M., Lledó, E., Mirabet, V., Llop, M., Barea, J., Montero, J.A., and Sepúlveda, P. (2009). Cardiac differentiation is driven by NKX2.5 and GATA4 nuclear translocation in tissue-specific mesenchymal stem cells. *Stem Cells Dev.* *18*, 907–918.
- Arsalan, M., Woitek, F., Adams, V., Linke, A., Barten, M.J., Dhein, S., Walther, T., Mohr, F.W., and Garbade, J. (2012). Distribution of cardiac stem cells in the human heart. *ISRN Cardiol.* *2012*, 483407.
- Barile, L., Messina, E., Giacomello, A., and Marbán, E. (2007). Endogenous cardiac stem cells. *Prog. Cardiovasc. Dis.* *50*, 31–48.
- Baum, C.M., Weissman, I.L., Tsukamoto, A.S., Buckle, A.M., and Peault, B. (1992). Isolation of a candidate human hematopoietic stem-cell population. *Proc. Natl. Acad. Sci. USA* *89*, 2804–2808.
- Bearzi, C., Rota, M., Hosoda, T., Tillmanns, J., Nascimbene, A., De Angelis, A., Yasuzawa-Amano, S., Trofimova, I., Siggins, R.W., Lecapitaine, N., et al. (2007). Human cardiac stem cells. *Proc. Natl. Acad. Sci. USA* *104*, 14068–14073.
- Bearzi, C., Leri, A., Lo Monaco, F., Rota, M., Gonzalez, A., Hosoda, T., Pepe, M., Qanud, K., Ojaimi, C., Bardelli, S., et al. (2009). Identification of a coronary vascular progenitor cell in the human heart. *Proc. Natl. Acad. Sci. USA* *106*, 15885–15890.
- Beltrami, A.P., Barlucchi, L., Torella, D., Baker, M., Limana, F., Chimenti, S., Kasahara, H., Rota, M., Musso, E., Urbanek, K., et al. (2003). Adult cardiac stem cells are multipotent and support myocardial regeneration. *Cell* *114*, 763–776.
- Bu, L., Jiang, X., Martin-Puig, S., Caron, L., Zhu, S., Shao, Y., Roberts, D.J., Huang, P.L., Domian, I.J., and Chien, K.R. (2009). Human ISL1 heart progenitors generate diverse multipotent cardiovascular cell lineages. *Nature* *460*, 113–117.
- Campbell, P.A., Perez-Iratxeta, C., Andrade-Navarro, M.A., and Rudnicki, M.A. (2007). Oct4 targets regulatory nodes to modulate stem cell function. *PLoS One* *2*, e553.
- Chen, F.G., Zhang, W.J., Bi, D., Liu, W., Wei, X., Chen, F.F., Zhu, L., Cui, L., and Cao, Y. (2007). Clonal analysis of nestin(-) vimentin(+) multipotent fibroblasts isolated from human dermis. *J. Cell Sci.* *120*, 2875–2883.
- Coultas, L., Chawengsaksophak, K., and Rossant, J. (2005). Endothelial cells and VEGF in vascular development. *Nature* *438*, 937–945.
- Davis, D.R., Zhang, Y., Smith, R.R., Cheng, K., Terrovitis, J., Malliaras, K., Li, T.S., White, A., Makkar, R., and Marbán, E. (2009). Validation of the cardiosphere method to culture cardiac progenitor cells from myocardial tissue. *PLoS One* *4*, e7195.
- Davis, D.R., Ruckdeschel Smith, R., and Marbán, E. (2010). Human cardiospheres are a source of stem cells with cardiomyogenic potential. *Stem Cells* *28*, 903–904.
- Deb, A., Wang, S., Skelding, K.A., Miller, D., Simper, D., and Caplice, N.M. (2003). Bone marrow-derived cardiomyocytes are present in adult human heart: a study of gender-mismatched bone marrow transplantation patients. *Circulation* *107*, 1247–1249.
- Fernandes, K.J., McKenzie, I.A., Mill, P., Smith, K.M., Akhavan, M., Barnabé-Heider, F., Biernaskie, J., Junek, A., Kobayashi, N.R., Toma, J.G., et al. (2004). A dermal niche for multipotent adult skin-derived precursor cells. *Nat. Cell Biol.* *6*, 1082–1093.
- Forte, E., Miraldi, F., Chimenti, I., Angelini, F., Zeuner, A., Giacomello, A., Mercola, M., and Messina, E. (2012). TGFβ-dependent epithelial-to-mesenchymal transition is required to generate cardiospheres from human adult heart biopsies. *Stem Cells Dev.* *21*, 3081–3090.
- Fraser, J.K., Schreiber, R., Strem, B., Zhu, M., Alfonso, Z., Wulur, I., and Hedrick, M.H. (2006). Plasticity of human adipose stem cells toward endothelial cells and cardiomyocytes. *Nat. Clin. Pract. Cardiovasc. Med.* *3* (Suppl 1), S33–S37.
- Gago, N., Pérez-López, V., Sanz-Jaka, J.P., Cormenzana, P., Eizaguirre, I., Bernad, A., and Izeta, A. (2009). Age-dependent depletion of human skin-derived progenitor cells. *Stem Cells* *27*, 1164–1172.
- Goumans, M.J., de Boer, T.P., Smits, A.M., van Laake, L.W., van Vliet, P., Metz, C.H., Korfage, T.H., Kats, K.P., Hochstenbach, R., Pasterkamp, G., et al. (2007). TGF-beta1 induces efficient differentiation of human cardiomyocyte progenitor cells into functional cardiomyocytes in vitro. *Stem Cell Res.* *1*, 138–149.
- He, J.Q., Vu, D.M., Hunt, G., Chugh, A., Bhatnagar, A., and Bolli, R. (2011). Human cardiac stem cells isolated from atrial appendages stably express c-kit. *PLoS One* *6*, e27719.
- Howard, E.W., Crider, B.J., Updike, D.L., Bullen, E.C., Parks, E.E., Haaksma, C.J., Sherry, D.M., and Tomasek, J.J. (2012). MMP-2



- expression by fibroblasts is suppressed by the myofibroblast phenotype. *Exp. Cell Res.* 318, 1542–1553.
- Kubo, H., Jaleel, N., Kumarapeli, A., Berretta, R.M., Bratinov, G., Shan, X., Wang, H., Houser, S.R., and Margulies, K.B. (2008). Increased cardiac myocyte progenitors in failing human hearts. *Circulation* 118, 649–657.
- Laflamme, M.A., Myerson, D., Saffitz, J.E., and Murry, C.E. (2002). Evidence for cardiomyocyte repopulation by extracardiac progenitors in transplanted human hearts. *Circ. Res.* 90, 634–640.
- Li, T.S., Cheng, K., Lee, S.T., Matsushita, S., Davis, D., Malliaras, K., Zhang, Y., Matsushita, N., Smith, R.R., and Marbán, E. (2010). Cardiospheres recapitulate a niche-like microenvironment rich in stemness and cell-matrix interactions, rationalizing their enhanced functional potency for myocardial repair. *Stem Cells* 28, 2088–2098.
- Loffredo, F.S., Steinhauser, M.L., Gannon, J., and Lee, R.T. (2011). Bone marrow-derived cell therapy stimulates endogenous cardiomyocyte progenitors and promotes cardiac repair. *Cell Stem Cell* 8, 389–398.
- Maitra, N., Flink, I.L., Bahl, J.J., and Morkin, E. (2000). Expression of alpha and beta integrins during terminal differentiation of cardiomyocytes. *Cardiovasc. Res.* 47, 715–725.
- Makkar, R.R., Smith, R.R., Cheng, K., Malliaras, K., Thomson, L.E., Berman, D., Czer, L.S., Marbán, L., Mendizabal, A., Johnston, P.V., et al. (2012). Intracoronary cardiosphere-derived cells for heart regeneration after myocardial infarction (CADUCEUS): a prospective, randomised phase 1 trial. *Lancet* 379, 895–904.
- Masuda, S., Montserrat, N., Okamura, D., Suzuki, K., and Izpisua Belmonte, J.C. (2012). Cardiosphere-derived cells for heart regeneration. *Lancet* 379, 2425–2426.
- Messina, E., De Angelis, L., Frati, G., Morrone, S., Chimenti, S., Fiordaliso, F., Salio, M., Battaglia, M., Latronico, M.V., Coletta, M., et al. (2004). Isolation and expansion of adult cardiac stem cells from human and murine heart. *Circ. Res.* 95, 911–921.
- Mishra, R., Vijayan, K., Colletti, E.J., Harrington, D.A., Matthies, T.S., Simpson, D., Goh, S.K., Walker, B.L., Almeida-Porada, G., Wang, D., et al. (2011). Characterization and functionality of cardiac progenitor cells in congenital heart patients. *Circulation* 123, 364–373.
- Moretti, A., Caron, L., Nakano, A., Lam, J.T., Bernshausen, A., Chen, Y., Qyang, Y., Bu, L., Sasaki, M., Martin-Puig, S., et al. (2006). Multipotent embryonic isl1+ progenitor cells lead to cardiac, smooth muscle, and endothelial cell diversification. *Cell* 127, 1151–1165.
- Murry, C.E., Soonpaa, M.H., Reinecke, H., Nakajima, H., Nakajima, H.O., Rubart, M., Pasmunthi, K.B., Virag, J.I., Bartelmez, S.H., Poppa, V., et al. (2004). Haematopoietic stem cells do not transdifferentiate into cardiac myocytes in myocardial infarcts. *Nature* 428, 664–668.
- Nelson, T.J., Faustino, R.S., Chiriack, A., Crespo-Diaz, R., Behfar, A., and Terzic, A. (2008). CXCR4+/FLK-1+ biomarkers select a cardiopoietic lineage from embryonic stem cells. *Stem Cells* 26, 1464–1473.
- Norris, R.A., Borg, T.K., Butcher, J.T., Baudino, T.A., Banerjee, I., and Markwald, R.R. (2008). Neonatal and adult cardiovascular pathophysiological remodeling and repair: developmental role of periostin. *Ann. N Y Acad. Sci.* 1123, 30–40.
- Oh, H., Chi, X., Bradfute, S.B., Mishina, Y., Pocius, J., Michael, L.H., Behringer, R.R., Schwartz, R.J., Entman, M.L., and Schneider, M.D. (2004). Cardiac muscle plasticity in adult and embryo by heart-derived progenitor cells. *Ann. N Y Acad. Sci.* 1015, 182–189.
- Pardo, M., Lang, B., Yu, L., Prosser, H., Bradley, A., Babu, M.M., and Choudhary, J. (2010). An expanded Oct4 interaction network: implications for stem cell biology, development, and disease. *Cell Stem Cell* 6, 382–395.
- Ramkisoensing, A.A., Pijnappels, D.A., Askar, S.F., Passier, R., Swildens, J., Goumans, M.J., Schutte, C.I., de Vries, A.A., Scherjon, S., Mummery, C.L., et al. (2011). Human embryonic and fetal mesenchymal stem cells differentiate toward three different cardiac lineages in contrast to their adult counterparts. *PLoS One* 6, e24164.
- Raynaud, C.M., Halabi, N., Elliott, D.A., Pasquier, J., Elefanty, A.G., Stanley, E.G., and Rafii, A. (2013). Human embryonic stem cell derived mesenchymal progenitors express cardiac markers but do not form contractile cardiomyocytes. *PLoS One* 8, e54524.
- Reynolds, B.A., and Weiss, S. (1992). Generation of neurons and astrocytes from isolated cells of the adult mammalian central nervous system. *Science* 255, 1707–1710.
- Sandstedt, J., Jonsson, M., Lindahl, A., Jeppsson, A., and Asp, J. (2010). C-kit+ CD45- cells found in the adult human heart represent a population of endothelial progenitor cells. *Basic Res. Cardiol.* 105, 545–556.
- Shakhova, O., and Sommer, L. (2010). Neural crest-derived stem cells. In *StemBook*, F. Gage and F. Watt, eds. (Boston: The Stem Cell Research Community) <http://dx.doi.org/10.3824/stembook.1.51.1>.
- Shimoji, K., Yuasa, S., Onizuka, T., Hattori, F., Tanaka, T., Hara, M., Ohno, Y., Chen, H., Egasgira, T., Seki, T., et al. (2010). G-CSF promotes the proliferation of developing cardiomyocytes in vivo and in derivation from ESCs and iPSCs. *Cell Stem Cell* 6, 227–237.
- Simpson, D.L., Mishra, R., Sharma, S., Goh, S.K., Deshmukh, S., and Kaushal, S. (2012). A strong regenerative ability of cardiac stem cells derived from neonatal hearts. *Circulation* 126 (11, Suppl 1), S46–S53.
- Smith, R.R., Barile, L., Cho, H.C., Leppo, M.K., Hare, J.M., Messina, E., Giacomello, A., Abraham, M.R., and Marbán, E. (2007). Regenerative potential of cardiosphere-derived cells expanded from percutaneous endomyocardial biopsy specimens. *Circulation* 115, 896–908.
- Smits, A.M., van Laake, L.W., den Ouden, K., Schreurs, C., Szuhai, K., van Echteld, C.J., Mummery, C.L., Doevendans, P.A., and Goumans, M.J. (2009). Human cardiomyocyte progenitor cell transplantation preserves long-term function of the infarcted mouse myocardium. *Cardiovasc. Res.* 83, 527–535.
- Snider, P., Standley, K.N., Wang, J., Azhar, M., Doetschman, T., and Conway, S.J. (2009). Origin of cardiac fibroblasts and the role of periostin. *Circ. Res.* 105, 934–947.
- Stawowy, P., Margeta, C., Kallisch, H., Seidah, N.G., Chrétien, M., Fleck, E., and Graf, K. (2004). Regulation of matrix metalloproteinase



MT1-MMP/MMP-2 in cardiac fibroblasts by TGF-beta1 involves furin-convertase. *Cardiovasc. Res.* *63*, 87–97.

Toma, C., Pittenger, M.F., Cahill, K.S., Byrne, B.J., and Kessler, P.D. (2002). Human mesenchymal stem cells differentiate to a cardiomyocyte phenotype in the adult murine heart. *Circulation* *105*, 93–98.

Tomita, Y., Matsumura, K., Wakamatsu, Y., Matsuzaki, Y., Shibuya, I., Kawaguchi, H., Ieda, M., Kanakubo, S., Shimazaki, T., Ogawa, S., et al. (2005). Cardiac neural crest cells contribute to the dormant multipotent stem cell in the mammalian heart. *J. Cell Biol.* *170*, 1135–1146.

Wu, S.M., Fujiwara, Y., Cibulsky, S.M., Clapham, D.E., Lien, C.L., Schultheiss, T.M., and Orkin, S.H. (2006). Developmental origin of a bipotential myocardial and smooth muscle cell precursor in the mammalian heart. *Cell* *127*, 1137–1150.

Wu, S.M., Chien, K.R., and Mummery, C. (2008). Origins and fates of cardiovascular progenitor cells. *Cell* *132*, 537–543.

Ye, J., Boyle, A., Shih, H., Sievers, R.E., Zhang, Y., Prasad, M., Su, H., Zhou, Y., Grossman, W., Bernstein, H.S., and Yeghiazarians, Y. (2012). Sca-1+ cardiosphere-derived cells are enriched for Isl1-expressing cardiac precursors and improve cardiac function after myocardial injury. *PLoS One* *7*, e30329.



### Supplemental Information

#### **THY-1 Receptor Expression Differentiates Cardiosphere-Derived Cells with Divergent Cardiogenic Differentiation Potential**

Nuria Gago-Lopez, Obinna Awaji, Yiqiang Zhang, Christopher Ko, Ali Nsair, David Liem, April Stempien-Otero, and W. Robb MacLellan

#### Inventory of Supplemental Information

- **Figure S1.** Gating strategy and FACS analysis of basal and differentiated cells (linked to Figure 1)
- **Figure S2.** Cell surface marker expression in fetal and adult AD, HDC and CS-derived cells (linked to Figure 3)
- **Figure S3.** Analysis of NKX2.5 subpopulations from fetal and adult hearts (linked to Figure 3)
- **Figure S4.** Isolation of clones from adult human CS-derived cells give rise mature cardiac myocytes (linked to Figure 4)
- **Figure S5.** Chromosomal location and quantification of CD90 transcripts within adult human CDC clones in RNA-seq analysis (linked to Figure 5)
- **Figure S6.** Analysis of CD90<sup>-</sup> and CD90<sup>+</sup> CS-derived clones (linked to Figure 6)
- **Figure S7.** Yield and differentiation of CS derived cells from explant derived cells versus heart derived cells. Purification and cardiomyogenic differentiation of C-KIT<sup>+</sup>/CD90<sup>-</sup> cells fraction (linked to Discussion)
- **Supplementary Table 1.** Human heart biopsies processed in this study.
- **Supplementary Table 2.** RNA-seq differential gene expression CD90<sup>-</sup> vs CD90<sup>+</sup> clones (linked to Figure 5) (Attached as separate Excel File)
- **Supplementary Table 3.** GO biological process involved in CD90<sup>-</sup> VS CD90<sup>+</sup> clones (linked to Figure 5) (Attached as separate Excel File)

- **Supplementary Table 4.** Canonical Pathways and molecules enrichment into CD90<sup>-</sup> vs CD90<sup>+</sup> human cardiospheres derived clones (linked to Figure 5)
- **Supplementary experimental procedures.**
- **Video S1.** Calcium fluorescence imaging of fetal human CS-derived cells demonstrating beating cardiomyocytes (linked to Figure 2)
- **Video S2.** Calcium fluorescence imaging from adult human CS-derived cardiac myocyte-like cells (linked to Figure 2)

FIGURE S1

**A. Undifferentiated cardiac cells**

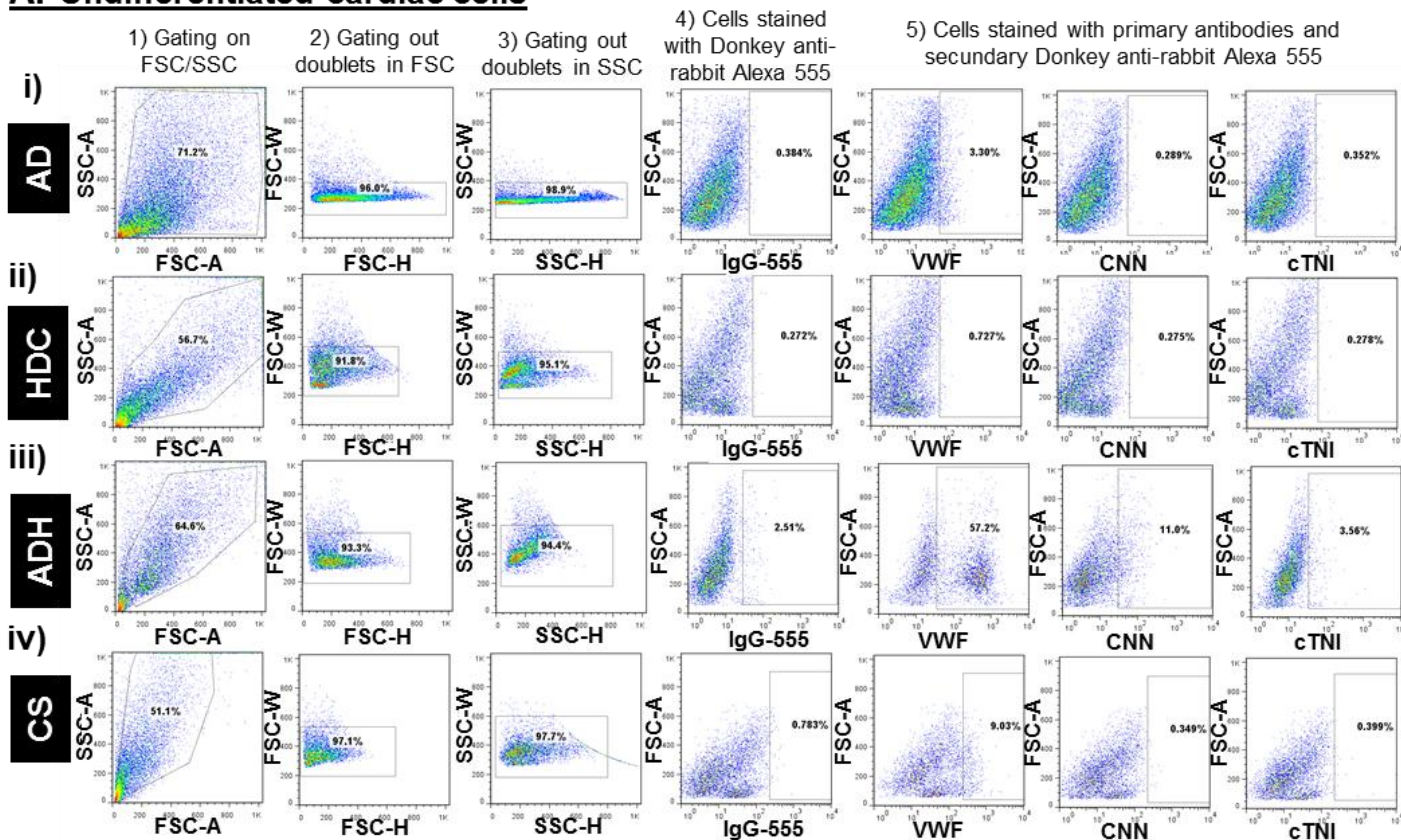

**B. Differentiated cardiac cells**

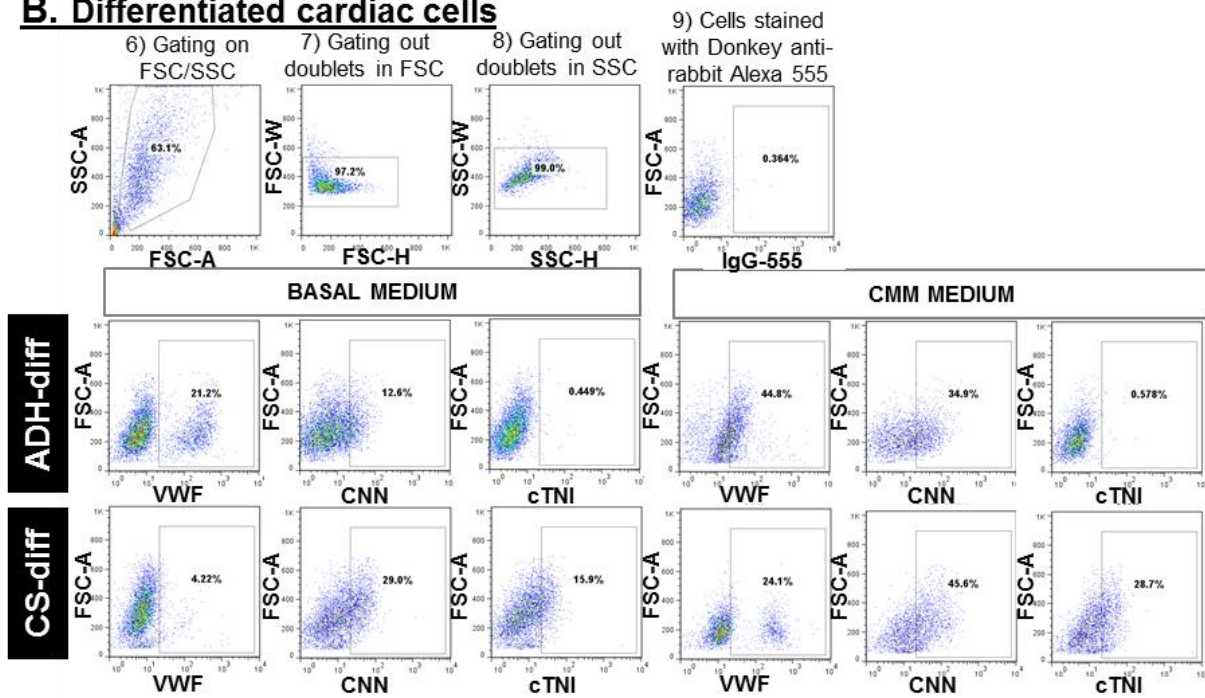

**Figure S1. Gating strategy and FACS analysis of basal and differentiated cells.** A, Gating strategy for AD, HDC, ADH, and CS cells stained with VWF, CNN and cTNI in undifferentiated conditions. B, Gating strategy for quantification post-differentiation of ADH-diff versus CS-diff cells. All experiments were repeated with cells with three independent heart samples.

**FIGURE S2**

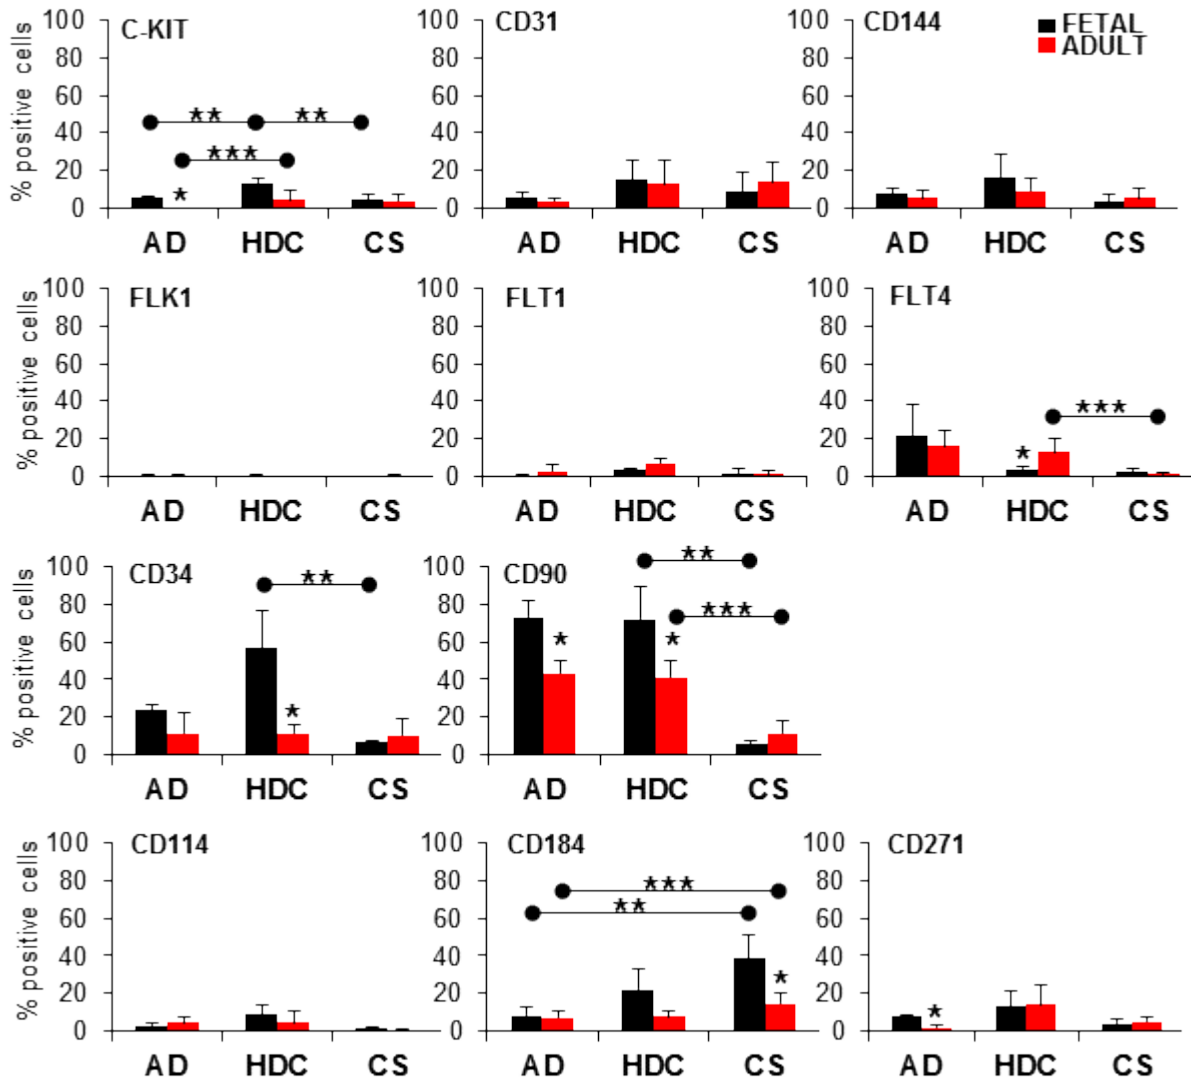

**Figure S2. Cell surface marker expression in fetal and adult AD, HDC and CS-derived cells.** A) Percentage of cells (% positive cells) for specific surface markers (C-KIT, CD34, CD31, CD144, CD90, CD114, CD184, CD271, FLK1, FLT1, and FLT4) from fetal and adult AD, HDC and CS cells by flow cytometry. \* $P < 0.05$  for comparisons between fetal and adult cells within a culture condition, \*\* $P < 0.05$  for

comparisons between fetal cells across the three culture conditions, and \*\*\* $P < 0.05$  for comparisons between adult cells across the three culture conditions.

**FIGURE S3**

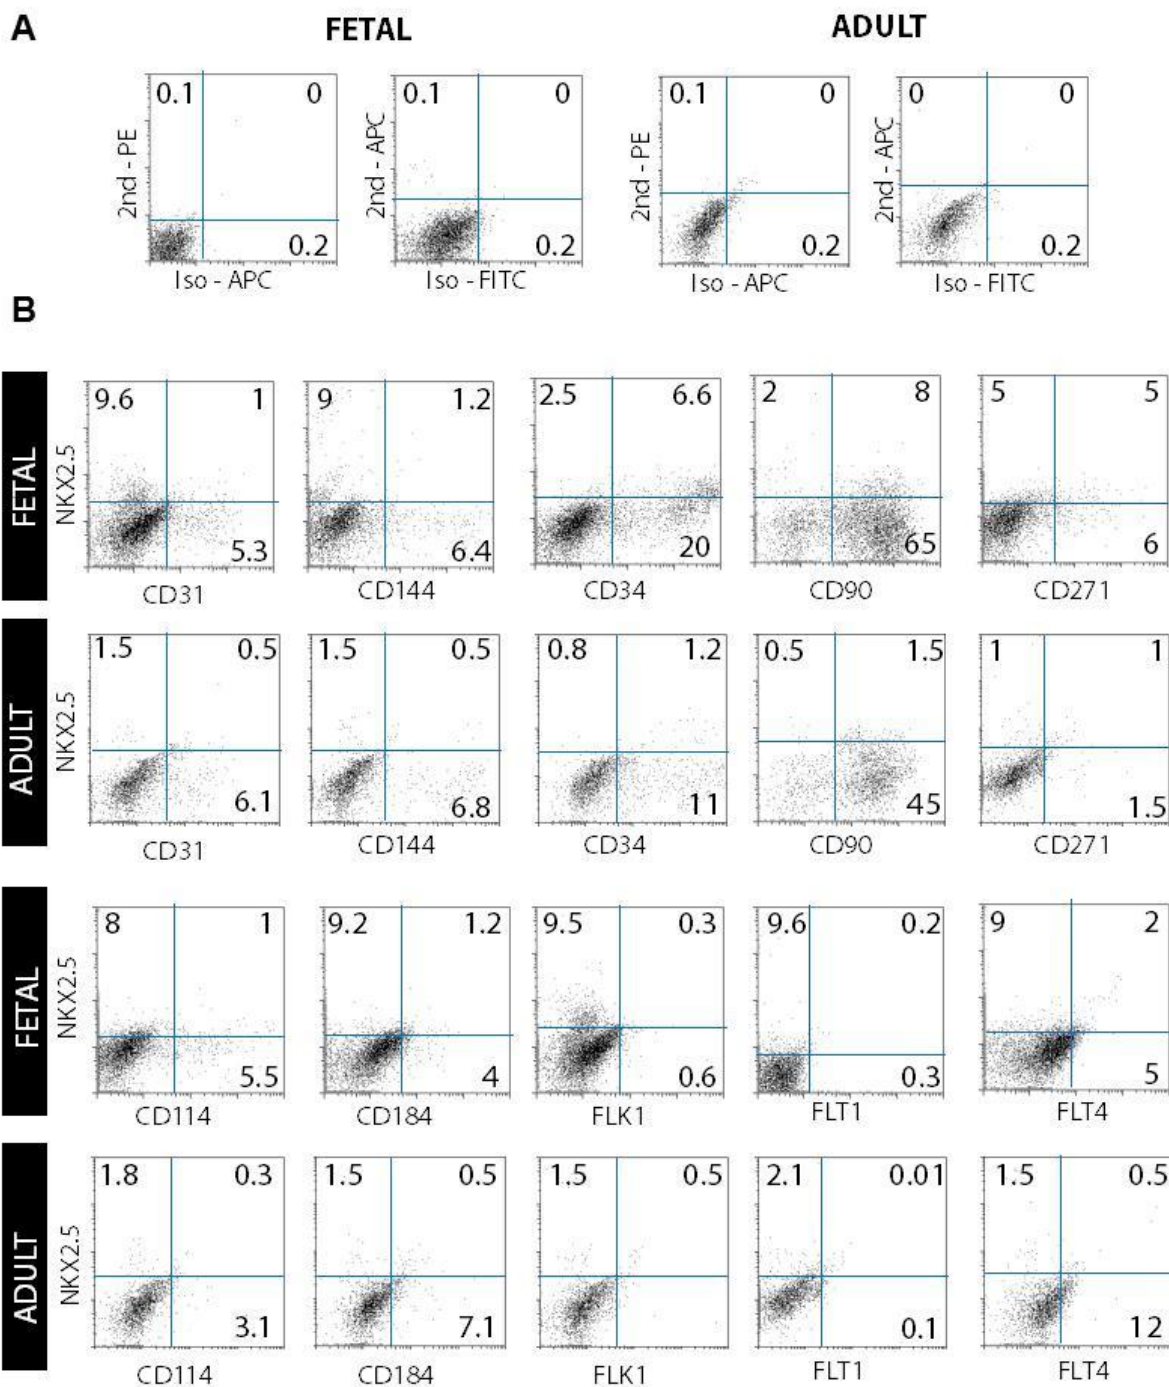

**Figure S3. Analysis of NKX2.5 subpopulations from fetal and adult hearts.** A, Representative dot plot graphs of negative controls (secondary antibody versus isotypes) for each fluorochrome used in this

analysis. B, Flow cytometry analysis of HDC cells for a panel of surface markers (X-axis) and NKX2.5 (Y-axis) from fetal and adult human heart samples. Total percentage of positive cells for each marker is shown. All experiments were repeated with cells from three independent heart samples.

**FIGURE S4**

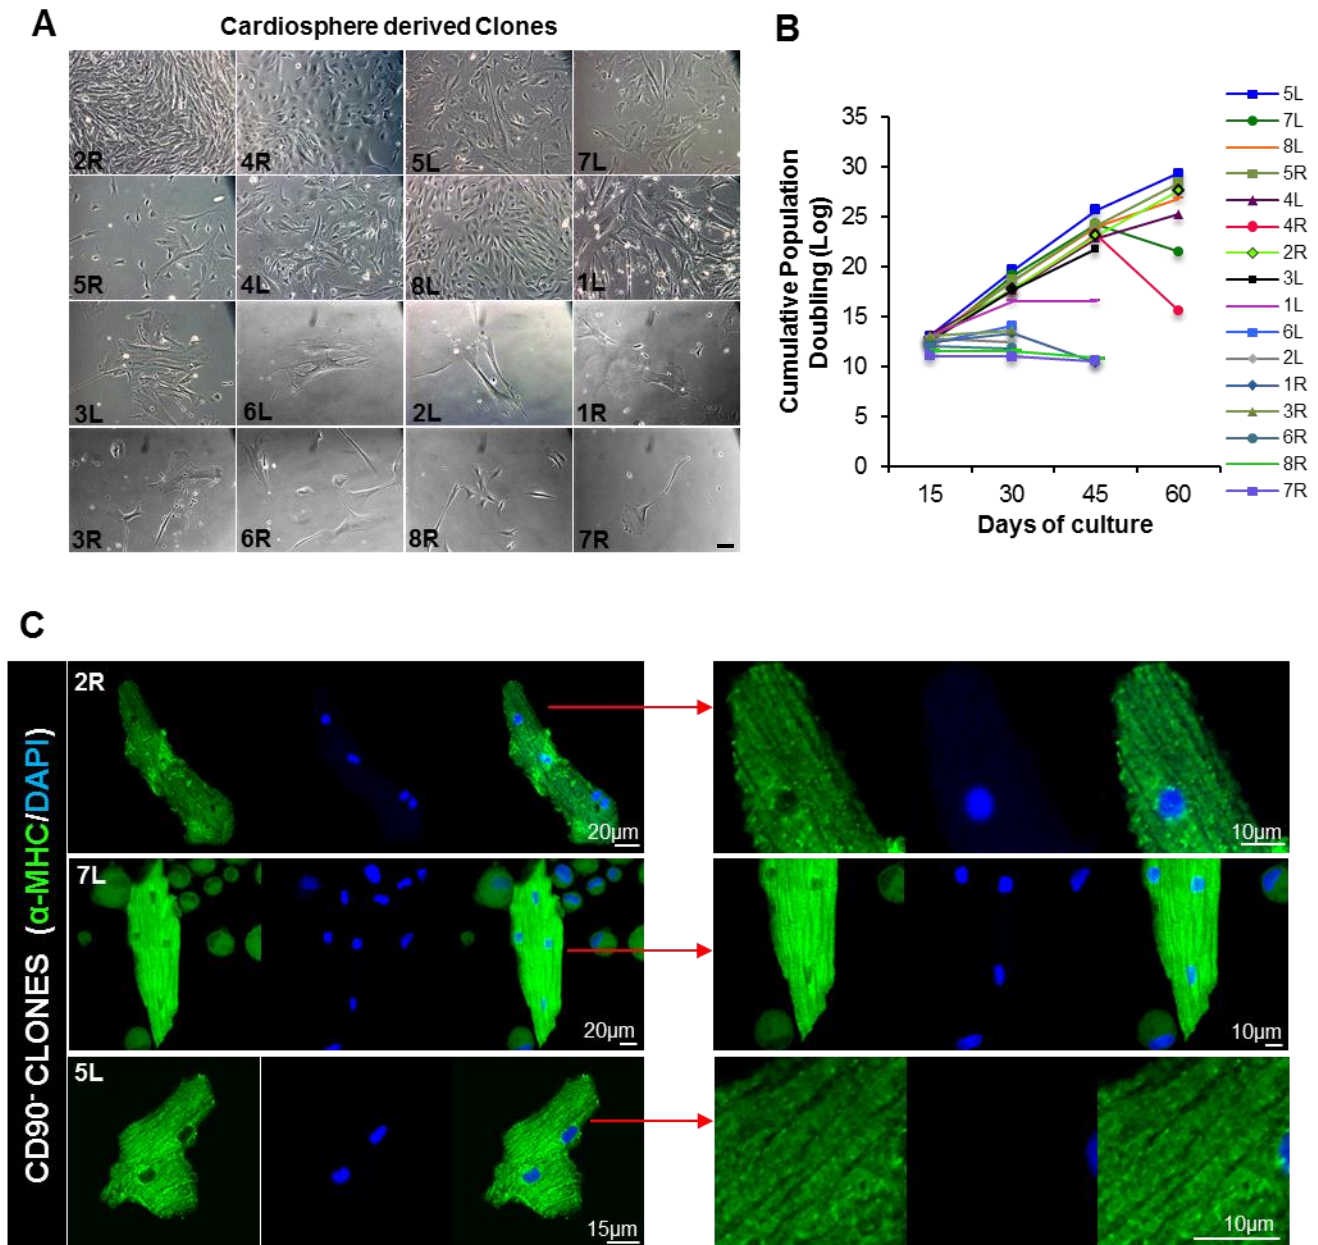

**Figure S4. Isolation of clones from adult human CS-derived cells give rise mature cardiac myocytes. A, Imaging of CS-derived clones after 30 days in culture. Scale bar: 50  $\mu$ m B, Cumulative**

population doubling of CS-derived clones demonstrating clones with premature senescence and clones that demonstrated growth for at least 60 days in culture (clones# 2R, 5L, 7L, 5R, 4L and 8L). C, CS-derived CD90<sup>-</sup> clones were differentiated and immunostained for alpha-myosin heavy chain ( $\alpha$ -MHC,) imaged by confocal microscopy. Nuclei were stained with DAPI (blue).

## FIGURE S5

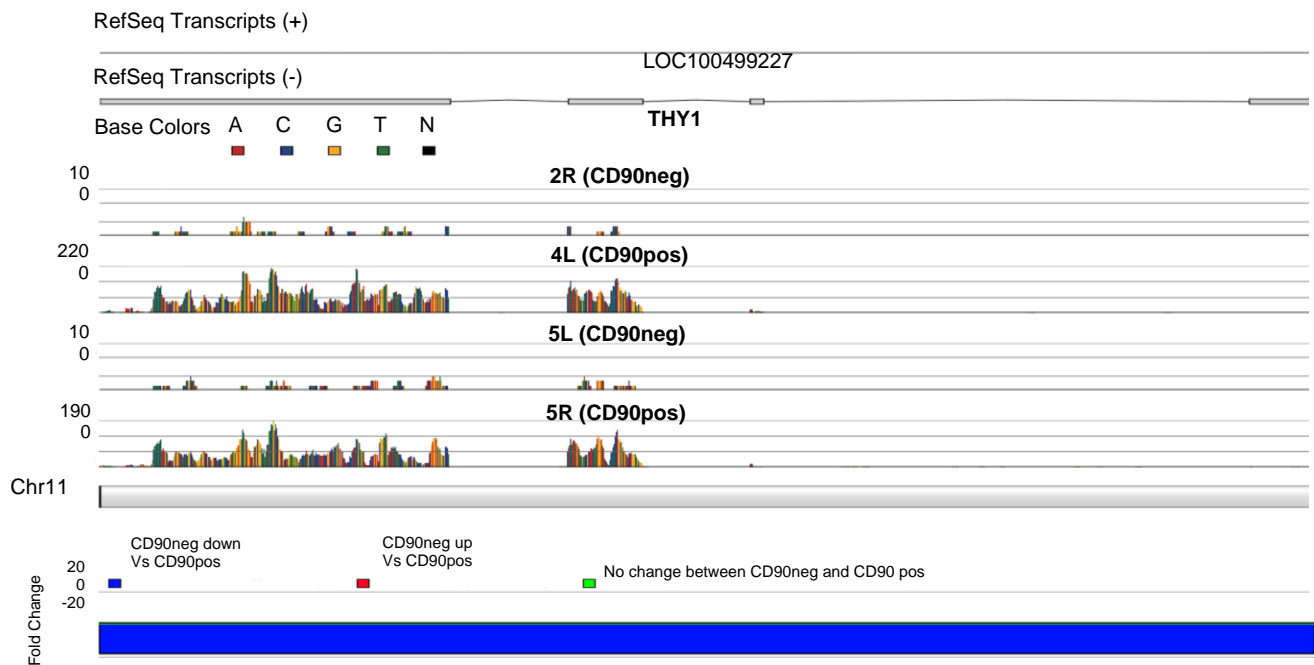

**Figure S5. Chromosomal location and quantification of CD90 transcripts within adult human CDC clones in RNA-seq analysis.** Quantification of CD90 transcripts for CD90<sup>+</sup> (2R, 5L; 10 transcripts) versus CD90<sup>-</sup> clones (4L, 5R; 190-220 transcripts) located on Chromosome 11. Blue line represents fold change in CD90<sup>-</sup> versus CD90<sup>+</sup> clones.

**FIGURE S6**

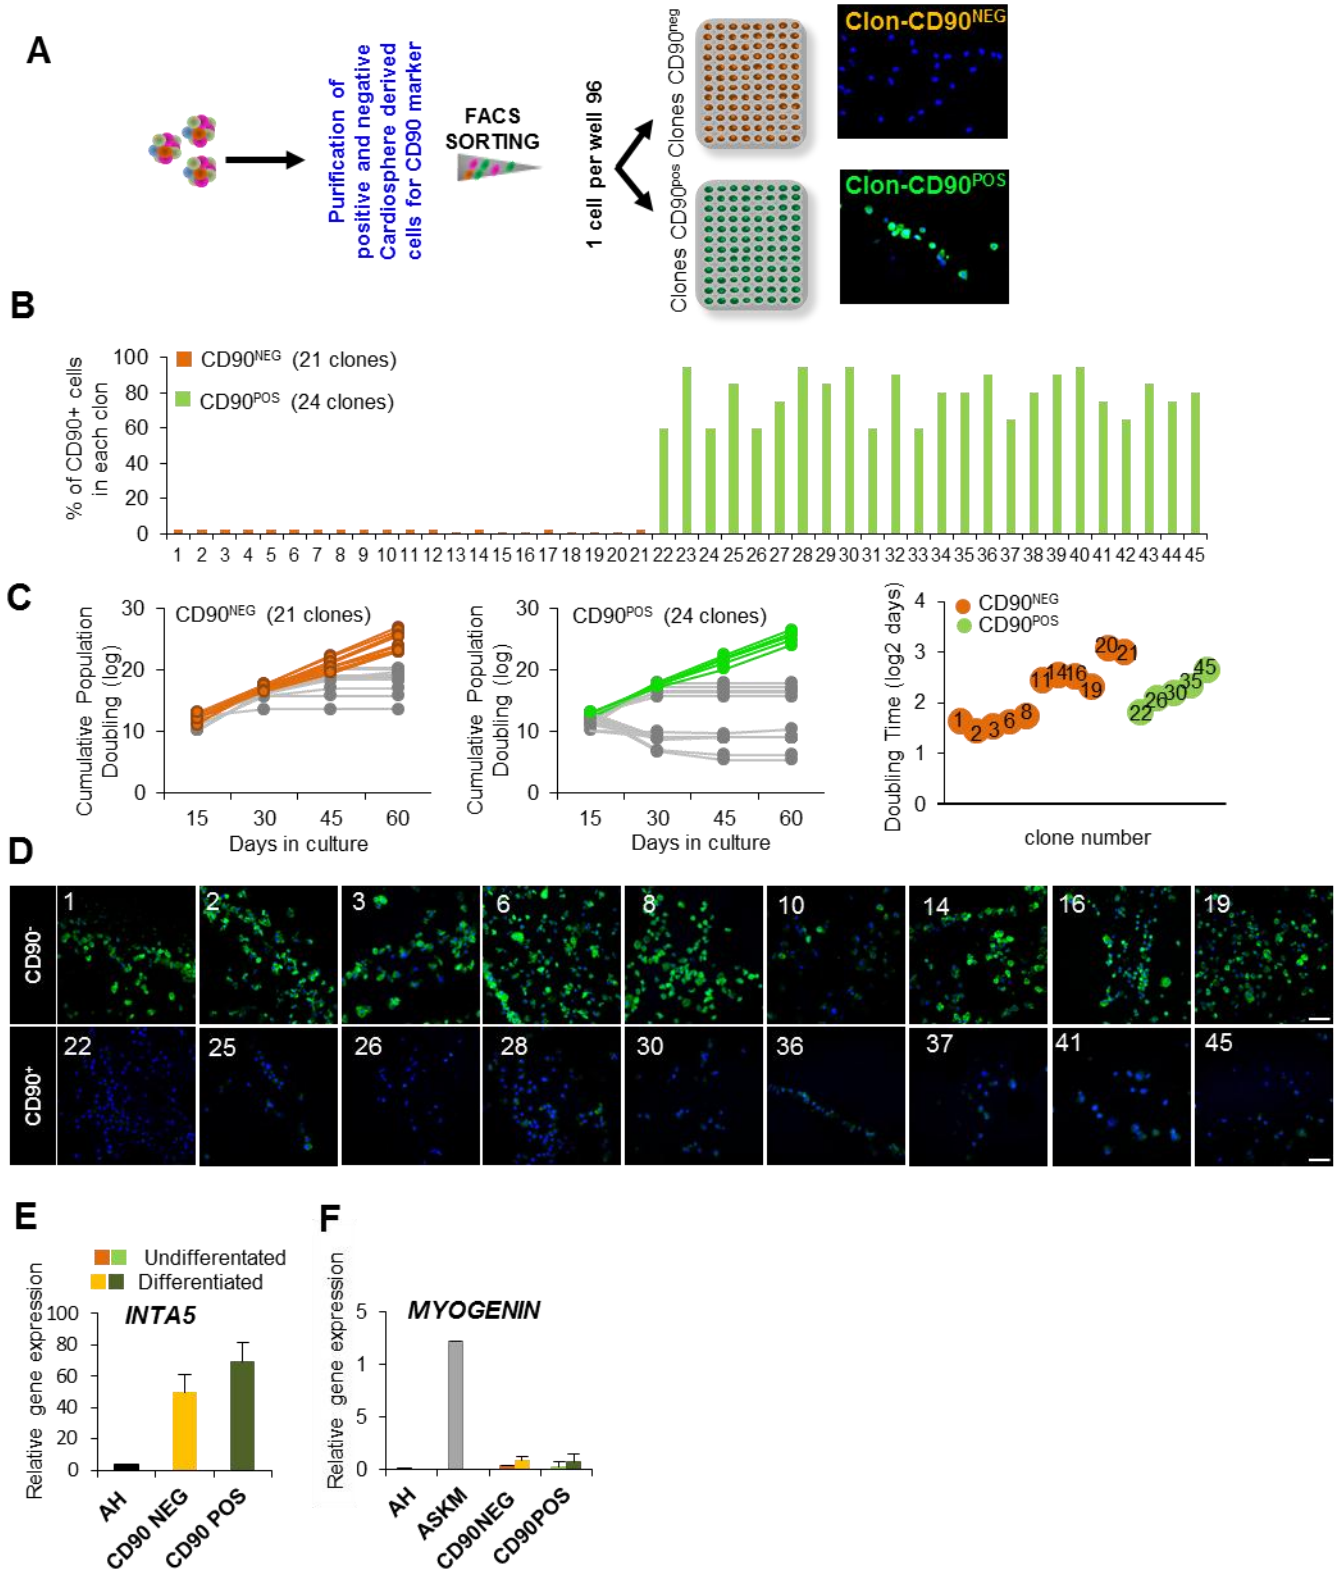



**Figure S6. Analysis of CD90<sup>-</sup> and CD90<sup>+</sup> CS-derived clones.** A, Schematic diagram outlining strategy for purification, cloning and imaging of CD90<sup>-</sup> and CD90<sup>+</sup> CS-derived clones. B, Pure CD90<sup>-</sup> and pure CD90<sup>+</sup> CS-derived clones were chosen by quantification of percentage of cells positive or negative for CD90 marker. C, Cumulative population doubling of CS-derived clones demonstrating clones with premature senescence (left-CD90<sup>-</sup> and middle-CD90<sup>+</sup> graphs: grey lines) and clones that demonstrated growth for at least 60 days in culture (orange for CD90<sup>-</sup>, green for CD90<sup>+</sup>); Doubling cell time (days) for proliferative CD90<sup>-</sup> and CD90<sup>+</sup> CS-derived clones (right graph). D, After 15 days in differentiation of CD90<sup>-</sup> and CD90<sup>+</sup> CS-derived clones, cells were recollected, stained for  $\alpha$ -actinin and cytopinned for confocal imaging. Scale bar: 100  $\mu$ m. E and F, Relative gene expression in undifferentiated and differentiated CD90<sup>-</sup> and CD90<sup>+</sup> CS-derived clones for *INTA5* (Integrin  $\alpha$ 5) and *MYOGENIN*. AH: Adult heart; ASKM: Adult skeletal muscle. N=26, \* $P$ < 0.05

FIGURE S7

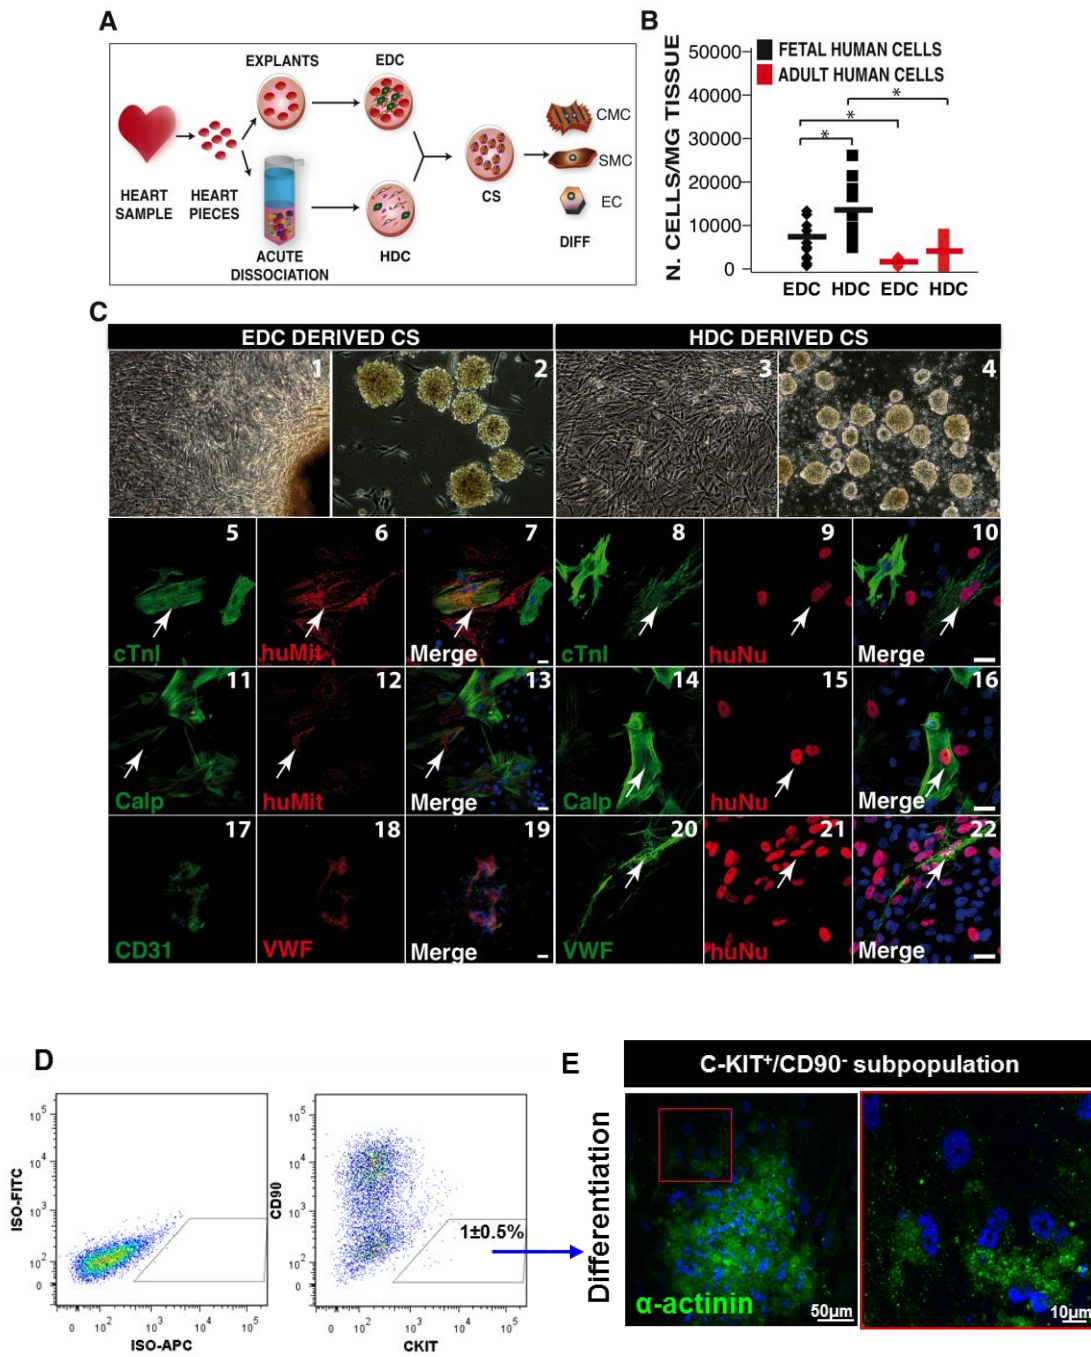

Figure S7. Yield and differentiation of CS derived cells from explant derived cells versus heart derived cells (A-C). Purification and cardiomyogenic differentiation of C-KIT<sup>+</sup>/CD90<sup>-</sup> cell fraction (D-E). A, Experimental design scheme: CS were created from cells obtained from acute dissociated heart tissue which we have called Heart derived cells (HDC) versus CS created from outgrowth cells

from heart explants called Explant derived cells (EDC). **B**, Comparison of yields of cells obtained of HDC versus EDC from fetal and adult heart biopsies. **C**, Comparison of CS formation (c1-4) and differentiation (c5-22) from HDC versus EDC cells. Cells from both sources readily formed cardiospheres that morphologically looked similar (Fig. C, c2, c4). Cells from both types of cardiospheres could differentiate into cardiomyocytes (cTroponinI, c5-c10), smooth muscle cells (Calponin, c11-c16) and endothelial cells (VWF or CD31, c17-c22) when placed in traditional differentiation condition coculture with neonatal rat ventricular cardiomyocytes. Human specific mitochondrial (HuMit) or/and Human specific nuclei (HuNu) were used to distinguish human versus rat cells. Nuclei were stained with DAPI (blue). Scale bar: 40  $\mu$ m. **D-E**, Flow cytometry analysis and FACS sorting of the C-KIT<sup>+</sup>/CD90<sup>-</sup> cell fraction (**D**) and cardiomyogenic differentiation after 15 days in CMM medium (**E**). Nuclei were stained with DAPI (blue). All experiments were repeated with cells from three independent heart samples.

## SUPPLEMENTARY TABLES

**Supplementary Table 1. Human heart biopsies processed in this study.**

| <b>ID # sample</b> <sup>(1)</sup> | <b>Age</b><br><b>F-w</b><br><b>A-y</b> <sup>(2)</sup> | <b>Sex</b> <sup>(3)</sup> | <b>Recovery cells</b><br><b>/ mg tissue</b> | <b>NO-VAD</b><br><b>POST-VAD</b> <sup>(4)</sup> | <b>Remarks</b> <sup>(5)</sup> |
|-----------------------------------|-------------------------------------------------------|---------------------------|---------------------------------------------|-------------------------------------------------|-------------------------------|
| FH3                               | 17 w                                                  | N/A*                      | 11652                                       | N/A                                             | N/A                           |
| FH10                              | 16 w                                                  | N/A                       | 33333                                       | N/A                                             | N/A                           |
| FH13                              | 15 w                                                  | N/A                       | 21782                                       | N/A                                             | N/A                           |
| FH14                              | 14 w                                                  | N/A                       | 19444                                       | N/A                                             | N/A                           |
| FH21                              | 15 w                                                  | N/A                       | 4081                                        | N/A                                             | N/A                           |
| FH23                              | 8 w                                                   | N/A                       | 3333                                        | N/A                                             | N/A                           |
| FH24                              | 16 w                                                  | N/A                       | 7353                                        | N/A                                             | N/A                           |
| FH26                              | 13 w                                                  | N/A                       | 13676                                       | N/A                                             | N/A                           |
| FH27                              | 14 w                                                  | N/A                       | 30612                                       | N/A                                             | N/A                           |
| FH28                              | 15 w                                                  | N/A                       | 18656                                       | N/A                                             | N/A                           |
| FH34                              | 16 w                                                  | N/A                       | 12643                                       | N/A                                             | N/A                           |

|      |      |     |       |          |         |
|------|------|-----|-------|----------|---------|
| FH35 | 16 w | N/A | 21839 | N/A      | N/A     |
| FH36 | 14 w | N/A | 8461  | N/A      | N/A     |
| FH37 | 13 w | N/A | 9803  | N/A      | N/A     |
| FH40 | 10 w | N/A | 8064  | N/A      | N/A     |
| FH41 | 11 w | N/A | 5833  | N/A      | N/A     |
| AH9  | 17 y | M   | 3077  | N/A      | N/A     |
| AH11 | 74 y | M   | 11206 | NO-VAD   | DCM     |
| AH12 | 59 y | M   | 6450  | NO-VAD   | DCM     |
| AH20 | 42 y | M   | 1500  | NO-VAD   | ICM     |
| AH38 | 33 y | F   | 4742  | NO-VAD   | CHD     |
| AH39 | 22 y | F   | 4545  | POST-VAD | DCM     |
| AH42 | 45 y | M   | 2857  | N/A      | N/A     |
| AH43 | 10 y | F   | 3714  | POST-VAD | DCM     |
| AH44 | 49 y | M   | 4918  | NO-VAD   | DCM     |
| AH45 | 42 y | M   | 6954  | POST-VAD | ICM     |
| AH48 | 57 y | F   | 2000  | NO-VAD   | ICM     |
| AH49 | 53 y | M   | 2250  | NO-VAD   | ICM     |
| AH50 | 56 y | F   | 1647  | POST-VAD | DCM/ICM |
| AH51 | 17 y | M   | 1433  | POST-VAD | DCM     |
| AH52 | 59 y | M   | 5389  | N/A      | ICM     |
| AH53 | 50 y | M   | 3540  | N/A      | DCM     |
| AH54 | 30 y | M   | 3567  | N/A      | DCM     |

<sup>(1)</sup> FH = Fetal Heart; AH = Adult Heart

<sup>(2)</sup> F-w = Fetal age (weeks); A-y = Adult age (years)

<sup>(3)</sup> M = Male; F = Female

<sup>(4)</sup> VAD = Ventricular Assist Device

<sup>(5)</sup> DCM = Dilated Cardiomyopathy; ICM = Ischemic Cardiomyopathy;  
CHD = Coronary Heart Disease

\* N/A = Not Applicable

## Supplementary Table 2. RNA-seq differential gene expression CD90<sup>-</sup> vs CD90<sup>+</sup> clones.

(Posted as separate Excel File)

## Supplementary Table 3. GO biological process involved in CD90<sup>-</sup> VS CD90<sup>+</sup> clones.

(Posted as separate Excel File)

## Supplementary Table 4. Canonical Pathways and molecules enrichment into CD90<sup>-</sup> vs CD90<sup>+</sup> human cardiospheres derived clones.

| Ingenuity Canonical Pathways                                         | -log(p-value) | Ratio | Molecules                                 |
|----------------------------------------------------------------------|---------------|-------|-------------------------------------------|
| Role of Oct4 in Mammalian Embryonic Stem Cell Pluripotency           | 3             | 0.09  | CCNF, PHC1, NR2F6, ASH2L                  |
| Methylglyoxal Degradation III                                        | 2             | 0.09  | AKR1C1/AKR1C2, ADH4                       |
| GNRH Signaling                                                       | 2             | 0.03  | MAP3K10, PAK4, MAP2K7, KRAS, DNM2         |
| FAK Signaling                                                        | 2             | 0.04  | DOCK1, PAK4, KRAS, GIT2                   |
| Sertoli Cell-Sertoli Cell Junction Signaling                         | 2             | 0.03  | MAP3K10, CDH1, MAP2K7, ZAK, KRAS, CLDN22  |
| Glutamine Biosynthesis I                                             | 2             | 0.13  | CCDC92                                    |
| Glutamine Degradation I                                              | 2             | 0.20  | GLS                                       |
| SAPK/JNK Signaling                                                   | 2             | 0.04  | MAP3K10, MAP2K7, ZAK, KRAS                |
| HGF Signaling                                                        | 1             | 0.04  | DOCK1, MAP3K10, MAP2K7, KRAS              |
| Paxillin Signaling                                                   | 1             | 0.04  | DOCK1, PAK4, KRAS, GIT2                   |
| Glutathione Redox Reactions II                                       | 1             | 0.14  | TXNDC12                                   |
| Inosine-5'-phosphate Biosynthesis II                                 | 1             | 0.06  | ATIC                                      |
| Germ Cell-Sertoli Cell Junction Signaling                            | 1             | 0.03  | MAP3K10, PAK4, CDH1, MAP2K7, KRAS         |
| Remodeling of Epithelial Adherens Junctions                          | 1             | 0.04  | CDH1, CLIP1, DNM2                         |
| Huntington's Disease Signaling                                       | 1             | 0.03  | HSPA4, MAP3K10, MAP2K7, GLS, VTI1B, DNM2  |
| Type II Diabetes Mellitus Signaling                                  | 1             | 0.02  | MAP2K7, SLC27A1, CEBPB, SMPD2             |
| NF-κB Signaling                                                      | 1             | 0.03  | AZI2, BMPR1B, MAP2K7, ZAP70, KRAS         |
| Triacylglycerol Biosynthesis                                         | 1             | 0.04  | DGAT1, ELOVL6                             |
| Stearate Biosynthesis I (Animals)                                    | 1             | 0.04  | SLC27A1, ELOVL6                           |
| Signaling by Rho Family GTPases                                      | 1             | 0.02  | MAP3K10, PAK4, CDH1, MAP2K7, SEPT1, CLIP1 |
| VDR/RXR Activation                                                   | 1             | 0.04  | YY1, CEBPB, CALB1                         |
| NRF2-mediated Oxidative Stress Response                              | 1             | 0.03  | MAP2K7, VCP, DNAJC14, KRAS, JUNB          |
| Regulation of IL-2 Expression in Activated and Anergic T Lymphocytes | 1             | 0.03  | MAP2K7, ZAP70, KRAS                       |
| EIF2 Signaling                                                       | 1             | 0.03  | RPL24, RPS4Y1, EIF3I, RPL35, KRAS         |

## SUPPLEMENTARY EXPERIMENTAL PROCEDURES

### Derivation of primary cardiac cell culture from human heart samples

To obtain acutely dissociated mononuclear heart cells (AD), the ventricular samples were washed with Hanks' balanced salt solution (HBSS), minced into small pieces (1-2 mm<sup>3</sup> pieces), and incubated in Type IV Collagenase (1mg/ml, Gibco), Dispase (0.15mg/ml, Gibco) and DNase I (7.5µg/ml, Sigma) for 30-60

min at 37°C until partially digested. Partially digested tissues were manually dissociated by trituration until single cells are obtained. The cell suspension was centrifuged (5 min, 1200 rpm) and pellet resuspended and passed through a 40-µm cell strainer (BD Biosciences). 25,000 cells/cm<sup>2</sup> were cultured in T-75 culture flasks (BD Falcon) pre-coated with Fibronectin (20µg/mL DPBS) with growth media (GM) [IMDM with 20% FBS, 5 ng/ml bFGF (Peprotech), 1% penicillin-streptomycin, 1% L-glutamine, and 0.001% 2-mercaptoethanol]. HDC adopted fibroblast-like morphology after 3 days in culture (Fig1A).

### **Cardiovascular differentiation in vitro**

Primary CS (5-10 units) or adherent cultures (10,000 cells /cm<sup>2</sup>) were seeded on 12-mm diameter laminin-coated (Sigma-Aldrich) coverslips (Menzel-Gläser, Braunschweig, Germany, <http://www.menzel.de>). Four distinct differentiation medias were used: (a) *basal medium*: same as CS-GM without growth factors and supplemented with 10% FBS (Gibco); (b) *cardiomyogenic medium*: CS were incubated in basal medium for 3 days and then in DMEM-F12 3:1 supplemented with 1% N2 (Gibco, Grand Island, NY, <http://www.invitrogen.com>), and 100 ng/ml Heregulin-β1 (Peprotech, Rocky Hill, NJ, <http://www.peprotech.com>) for 12 days. For long differentiation (60-90 days), CS derived clones were incubated in GM without growth factors and supplemented with 2% B27; (c) *smooth-muscle medium*: same components as basal media with additional 10 ng/mL platelet-derived growth factor–beta (PDGF-β, Peprotech). (d) *Endothelial medium*: same components as basal media with additional 50 ng/mL vascular endothelial growth factor (VEGF, Peprotech). For endothelial cell tube formation assay we followed the BD protocol (BD Matrigel matrix cat. No. 354234). Briefly, 300 µl of BD Matrigel was added in 24-well culture plates on ice and incubates at 37°C for 30-60 minutes. Then, 5-10 CS were seeded over polymerized matrigel and were grown in endothelial medium. Capillary tube formation was assessed after 24-48 h using an inverted microscope (Zeiss, model Axiovert 200) fitted with a AxioCam MRC digital camera (Photometrics, Tucson, AZ). Images were acquired and processed using AxioVision Release 4.6 software. All differentiation experiments were performed for 2-3 weeks, replacing differentiation media every 3 days.

## **Immunofluorescence in cover-slides and cytopsin**

Cells were rinsed with PBS and fixed with 4% paraformaldehyde for 15 minutes, PBS-washed three times, and processed for immunofluorescence. Cells were permeabilized with 0.5% Triton X-100 for 10 minutes, washed twice with PBS, and blocked with 10% normal donkey serum in PBS (Jackson ImmunoResearch laboratories, Inc) for 20 minutes at RT. Primary and secondary antibodies were incubated with 10% normal donkey serum (in PBS) for 1 hour each at RT, with three 3 minutes PBS washes in between. Cells were washed again with PBS and nuclei were counterstained with Dapi (Molecular Probes Inc.) or Hoechst 33258 (Sigma-Aldrich) depending on the experiment. Primary antibodies used include human cTNT (R&D), cTNI (Santa Cruz), alpha-sarcomeric actin (Sigma), alpha-MHC (Abcam), Calponin (Abcam), VWF (Dako) and NKX2.5 (Santa Cruz clone A-16). Secondary antibodies conjugated to the appropriate fluorophores (Alexa Fluor 488, Alexa Fluor 555, Alexa Fluor 647; Molecular Probes Inc., Eugene, OR, <http://probes.invitrogen.com>). After staining, cells were then washed twice with PBS and mounted with Mowiol (Sigma) to be analyzed by confocal microscopy. For cytopsin samples,  $2.5-5 \times 10^4$  cells were suspended in 100ul of cold 1% FBS/ 1% BSA-PBS and spun down onto coated slides using a ThermoShandon Cytospin 4 apparatus (Thermo Shandon Inc., Pittsburgh,PA, <http://www.thermo.com>). The slides were then mounted with Mowiol and analyzed by confocal microscopy.

## **Calcium Fluorescence Imaging**

Cell cultures were incubated with the fluorescent calcium indicator dye Fluo-4 AM (10  $\mu$ M, Invitrogen) and nonionic surfactant Pluronic F-127 (0.02%, Invitrogen) in cardiomyogenic medium for 30 minutes. Following two gentle washes with PBS 1X, the cells were bathed in media without Fluo-4 for imaging. Spontaneous calcium fluorescence activity in cell cultures was imaged and recorded using an inverted Nikon Diaphot microscope (60X objective, Olympus) equipped with a charge-coupled device (CCD)-based Photometrics Cascade 128+ camera (105 frames per second, spatial resolution 128 x 128 pixels) operating under Imaging Workbench software (version 6.0, INDEC BioSystems). The acquired video image data were processed using ImageJ software (National Institutes of Health).

## **Flow Cytometry**

Primary cultures, CS or differentiated cultures were dissociated with 0.1% Trypsin-EDTA (sigma) for 4 min at 37C, PBS-washed, counted, resuspended in PBS with 1% FBS, 1% BSA and 0.1% Sodium Azide (Staining buffer), and stained for 30-40 min at 4C with the following surface markers (BD Biosciences) depend on experiment: CD31 (ref 555445), CD144 (clon 55-7H1), CD34 (clon 8G12), CD90 (ref 555595), CD114 (ref 554538), C-KIT (ref 341096) CD184 (ref 555974), CD271 (Clon C40-1457) and from R&D: FLK1 (FAB357A), FLT1 (FAB321A), FLT4 (FAB3492P). To control for non-specifically bound fluorescence, isotype antibodies used (BD Biosciences) were FITC, PE and APC Mouse IgG1 k isotype controls. For intracellular proteins, staining was carried out on cells fixed with 2% paraformaldehyde (Electron Microscopy Sciences, Hatfield PA) in PBS for 10 min and washed with PBS. Staining with primary and secondary antibodies was done in staining buffer plus 0.25% Saponin (Sigma) for 45 min at room temperature washing with PBS three times. Matched control secondary IgG antibodies used were for FITC, PE and APC (BD Biosciences) experiments.

## **Cell Sorting**

HDC and CS-derived cells from three independent fetal and/or adult human heart samples were resuspended in Ca<sup>++</sup>/Mg<sup>++</sup>-free Dulbecco's phosphate-buffered saline (DPBS, Cellgro) with 10% FBS and filtered through a 40 µm cell strainer onto 5 ml polypropylene sterile tubes. Presorted samples were kept in agitation at 4°C. Scatter parameters were acquired on linear mode and fluorescence parameter on log mode. PMT setting were established on live (AAD-7 negative) single cells by using unstained cells. Non-specific binding was evaluated with the corresponding isotype controls used at the same concentration to the antibody of interest. Sorting procedures were done excluding dead cells and doublets. Sorted cells were expanded in proliferation medium (with serum) and then used to create CS.



## Clonal Assay

After 7 days in CS culture (suspension without serum), CS-derived cells were disaggregated in single cells to generate clones on 96 well plates treated with fibronectin (adhesion with serum). To obtain single cells, CS-derived cells were washed with DPBS, trypsinized with a 0.1% trypsin solution (Sigma) for 4 min at 37°C, neutralized with serum and centrifuged at 1,200 rpm for 5 min. Pellet was resuspended in Proliferating medium and cell number was determined using a hemocytometer. Cells were diluted with medium to a calculated concentration of 1 cell per 100  $\mu$ l, and 100  $\mu$ l of this suspension was then added to individual wells of a 96-well culture plate treated with fibronectin for adhesion culture. After several hours, each well was scored for the presence or absence of single cells. For each well containing a single cell, additional 100  $\mu$ l of proliferating medium was added. Then, medium was changed two times in the week. Clones were monitored and photographed over a 4-6 week period, at the end of which the wells were confluent. Each clone was dissociated and transferred to a single well of a 24-well plate, and after 10-12 days in proliferation medium, cells were again dissociated and transferred to a flask 25 cm<sup>2</sup>.

Direct cell cloning of CS-derived CD90<sup>-</sup> and CD90<sup>+</sup> cells was carried out using BD FACSAria III cell sorter. The cells were sorted directly into separate wells of a 96-well plate (one cell per well) containing 200  $\mu$ l of medium using a CloneCyt automated cell deposition unit. Calibration of the clone sorting using fluorescent beads showed that <1% of the wells received more or less than one bead.

## RNA isolation and quantitative real time-PCR

Total RNA was prepared with the RNeasy mini or micro kits (QIAGEN) and treated with RNase-free DNase (QIAGEN). 100 ng to 1 mg RNA was reverse transcribed into cDNA via random hexamers and Oligo (dT) with Superscript III Reverse Transcriptase (Roche). Real-time quantitative PCR was performed on a MasterCycler EP RealPlex (Eppendorf). All experiments were done in triplicate with SYBR Green JumpStart Taq ReadyMix (Sigma). The oligonucleotide sequences are *CD90* forward: TCAGGAAATGGCTTTTCCCA; *CD90* reverse: TCCTCAATGAGATGCCATAAGCT. *CD105* forward: CATCCTTGAAGTCCATGTCCTCTT; *CD105* reverse: GCCAGGTGCCATTTTGCTT. *NKX2-5* forward:

ACCTCAACAGCTCCCTGACTCT; *NKX2-5* reverse: ATAATCGCCGCCACAACTCTCC. *ISL-1* forward: GAAGGTGGAGCTGCATTGGTTTGA; *ISL-1* reverse: TAAACCAGCTACAGGACAGGCCAA. *PERIOSTIN* forward: GGAGACAAAGTGGCTTCCGA; *PERIOSTIN* reverse: AATTGGGCCACAAGATCCGT. *ACTA2* forward: TCTCTATGCTAACAACGTCCTGTCA; *ACTA2* reverse: CCACCGATCCAGACAGAGTACTT. *TNNT2* forward: TTCACCAAAGATCTGCTCCTCGCT; *TNNT2* reverse: TTATTACTGGTGTGGAGTGGGTGTGG; *INTA7* forward: CTCCTGTGGAAGATGGGATTCT; *INTA7* reverse: GTCTTCTCCTCCTTGAAGTCT. *INTA5* forward: CCTATGAGGCTGAGCTTCGG; *INTA5* reverse: GGTGCAGTTGAGTCCCGTAA. *MYOGENIN* forward: AACTACCTGCCTGTCCACC; *MYOGENIN* reverse: GAGCAGGGTGCTTCTCTTCA. Gene relative expression was calculated in relation to their *GAPDH* quantitative expression and normalized.

## **RNA-seq**

Whole-genome transcriptomic analysis was performed by Next-Gen RNA-sequencing in two groups of CDC: CD90neg (clones 2R and 5L) and CD90pos (clones 5R and 4L). Next-Gen library construction and sequencing procedures were carried out by High Throughput Genomic Center facility in the Department of Genome Sciences at University of Washington. After confirmation of RNA quality by Agilent BioAnalyzer 2100, the stranded and indexed RNA-Seq libraries were constructed from total RNA using True Seq Stranded Total RNA LT with Ribo-Zero™ Human/Mouse/Rat Set A kit (Illumina, San Diego, CA) as per the manufacturer's recommendations. The libraries constructed underwent Pilot sequencing at 24-plex to assess library quality while providing a quantification for in-depth sequencing. The libraries were finally sequenced to provide single-end 1X36 reads to depths of 30-40 M tags per sample. Sequencing reads were filtered for polymers, primer adaptors, and ribosomal RNAs and then mapped against the human genome assembly (NCBI Build 37.1) using Bowtie pipeline. Data was imported to Partek Genomics Suite 6.12 for analysis of read alignment and counting, and evaluation of differential gene expression between CD90neg and CD90pos CDCs using ANOVA test on RPKM of genes. Gene reads between groups having a fold-change of 1.5 or more and  $p < 0.05$  were considered to be significant. These differentially expressed genes (DEGs) were further analyzed on canonical

Pathways and networks, as well as upstream regulators such as transcription factors with Ingenuity pathway Analysis (IPA, Ingenuity Systems, Inc, Redwood City, CA).

#### **SUPPLEMENTARY VIDEO CAPTIONS**

**Video S1. Calcium fluorescence imaging of fetal human CS-derived cells demonstrating beating cardiomyocytes.** Cells were incubated with the fluorescent calcium indicator dye Fluo-4 AM and nonionic surfactant Pluronic F-127 in cardiomyogenic medium for 30 minutes. Spontaneous calcium fluorescence activity in cell cultures was imaged and recorded. The acquired video image data were processed using ImageJ software.

(Attached as separate Movie File)

**Video S2. Calcium fluorescence imaging from adult human CS-derived cardiac myocyte-like cells.** Cell culture were incubated with the fluorescent calcium indicator dye Fluo-4 AM and nonionic surfactant Pluronic F-127 in cardiomyogenic medium for 30 minutes. Spontaneous calcium fluorescence activity in cell cultures was imaged and recorded but no calcium transients were observed. The acquired video image data were processed using ImageJ software.

(Attached as separate Movie File)
